# Supplementary material for: Potential sources and processes affecting speciated atmospheric mercury at Kejimkujik National Park, Canada
Source: Copernicus journal article supplement (doi:10.5194/acp-2016-516), 2016-06-29
Supplement: Supplementary file 1 [file acp-2016-516-supplement.pdf]

## Supplementary Information

### Potential sources and processes affecting speciated atmospheric mercury at Kejimikujik National Park, Canada

Xiaohong Xu, Yanying Liao, Irene Cheng, Leiming Zhang

#### Contents

**Table S1.** Emission of Hg and other pollutants reported in NPRI within 150 Km of the sampling site (Data source: Environmental Canada, 2016).

**Table S2.** Coefficients of cross-correlation among all variables in 2009 (bold numbers are significant at  $p < 0.05$ ).

**Table S3.** Coefficients of cross-correlation among all variables in 2010 (bold numbers are significant at  $p < 0.05$ ).

**Table S4.** PMF factor contributions to speciated Hg and ratios of predicted to observed annual Hg concentrations in 2009.

**Table S5.** PMF factor contributions to speciated Hg and ratios of predicted to observed annual Hg concentrations in 2010.

**Table S6.** Pearson correlation coefficients between Hg forms and other compounds in Case 2009, Case 09+mean, and Case 09+median (bold numbers are significant at  $< 0.05$ ).

**Table S7.** Pearson correlation coefficients between Hg forms and other compounds in Case 2010, Case 10+mean, and Case 10+median (bold numbers are significant at  $< 0.05$ ).

**Figure S1.** Obs/Pred scatter plot in 2009. a) Case 2009, b) Case 09+mean, c) Case 09+median, d) Case 09+RM, e) Case 09-RM, and f) Case 09ScaleRM, observed GOM and PBM have been scaled.

**Figure S2.** Obs/Pred scatter plot in 2010. a) Case 2010, b) Case 10+mean, c) Case 10+median, d) Case 10+RM, e) Case 10-RM, and f) Case 10ScaleRM, observed GOM and PBM have been scaled.

**Figure S3.** Obs/Pred time series in 2009. a) Case 2009, b) Case 09+mean, c) Case 09+median, d) Case 09+RM, e) Case 09-RM, and f) Case 09ScaleRM, observed GOM and PBM have been scaled.

**Figure S4.** Obs/Pred time series in 2010. a) Case 2010, b) Case 10+mean, c) Case 10+median, d) Case 10+RM, e) Case 10-RM, and f) Case 10ScaleRM, observed GOM and PBM have been scaled.

**Table S1.** Emission of Hg and other pollutants reported in NPRI within 150 Km of the sampling site (Data source: Environmental Canada, 2016).

| Facility                                                                                      | Location<br>(lat, long)     | Distance to<br>KEJ/direction | Hg (Kg) |      | SO <sub>2</sub> (Tonnes) |      | NO <sub>2</sub> (Tonnes) |      | NH <sub>3</sub> (Tonnes) |      |
|-----------------------------------------------------------------------------------------------|-----------------------------|------------------------------|---------|------|--------------------------|------|--------------------------|------|--------------------------|------|
|                                                                                               |                             |                              | 2009    | 2010 | 2009                     | 2010 | 2009                     | 2010 | 2009                     | 2010 |
| Brooklyn Power                                                                                | Brooklyn<br>(44°N, 64°W)    | 50 Km<br>southeast           | 0       | 0    | 9.9                      | 26   | 309                      | 259  | 0                        | 0    |
| Michelin North America (Canada)                                                               | Bridgewater<br>(44°N, 64°W) | 53 Km<br>east                | 0       | 0    | 195                      | 184  | 68                       | 63   | 0                        | 0    |
| High Liner Foods INC.                                                                         | Lunenburg<br>(44°N, 64°W)   | 72 Km<br>east                | 0       | 0    | 27                       | 27   | 0                        | 0    | 0                        | 0    |
| Department of National Defence                                                                | Greenwood<br>(44°N, 65°W)   | 75 Km<br>north               | 0       | 0    | 55                       | 68   | 19                       | 18   | 0                        | 0    |
| Louisiana-Pacific Canada LTD.                                                                 | East River<br>(44°N, 64°W)  | 88 Km<br>northeast           | 0       | 0    | 122                      | 102  | 100                      | 99   | 0                        | 0    |
| Maple Leaf Foods/Larsen Packers<br>Limiter                                                    | Berwick<br>(45°N, 64°W)     | 89 Km<br>northeast           | 0       | 0    | 51                       | 38   | 0                        | 0    | 0                        | 0    |
| Michelin North America (Canada)                                                               | Waterville<br>(45°N, 64°W)  | 92 Km<br>northeast           | 0       | 0    | 162                      | 182  | 57                       | 62   | 0                        | 0    |
| Acadia University/Acadia Campus                                                               | Wolfville<br>(45°N, 64°W)   | 108 Km<br>northeast          | 0       | 0    | 77                       | 73   | 27                       | 26   | 0                        | 0    |
| CKF INC.                                                                                      | Hantsport<br>(45°N, 64°W)   | 116 Km<br>northeast          | 0       | 0    | 66                       | 57   | 21                       | 0    | 0                        | 0    |
| Minas Basin Pulp and Power Company<br>Limited                                                 | Hantsport<br>(45°N, 64°W)   | 116 Km<br>northeast          | 0       | 0    | 225                      | 260  | 66                       | 76   | 0                        | 0    |
| Mount Saint Vincent University                                                                | Halifax<br>(44°N, 63°W)     | 129 Km<br>northeast          | 0       | 0    | 27                       | 13   | 7.2                      | 3.9  | 0                        | 0    |
| Department of National Defence –<br>CFB Halifax – Canadian Forces<br>Ammunition Depot Bedford | Bedford<br>(44°N, 63°W)     | 131 Km<br>northeast          | 0       | 0    | 56                       | 50   | 0                        | 0    | 0                        | 0    |
| Department of National Defence –<br>CFB Halifax – Windsor Park                                | Halifax<br>(44°N, 63°W)     | 132 Km<br>northeast          | 0       | 0    | 59                       | 44   | 36                       | 30   | 0                        | 0    |

|                                                                     |                            |                     |       |      |         |        |        |        |       |      |
|---------------------------------------------------------------------|----------------------------|---------------------|-------|------|---------|--------|--------|--------|-------|------|
| Dalhousie University                                                | Halifax<br>(44°N, 63°W)    | 133 Km<br>northeast | 0.18  | 0.15 | 253     | 260    | 89     | 72     | 0     | 0    |
| Department of National Defence/CFB<br>Halifax -Stadacona/Dockyard   | Halifax<br>(44°N, 63°W)    | 133 Km<br>northeast | 0     | 0    | 211     | 177    | 58     | 51     | 0     | 0    |
| Capital Health – Camp Hill Site<br>Central Heating Plant            | Halifax<br>(44°N, 63°W)    | 133 Km<br>northeast | 0     | 0    | 15      | 12     | 14     | 20     | 0     | 0    |
| Saint Mary's University - Halifax                                   | Halifax<br>(44N, 63W)      | 133 Km<br>northeast | 0     | 0    | 1.2     | 0      | 3      | 0      | 0     | 0    |
| Oland Brewery/Main Plant                                            | Halifax<br>(44°N, 63°W)    | 133 Km<br>northeast | 0     | 0    | 31      | 0      | 0      | 0      | 0     | 0    |
| Nova Scotia Power Incorporated/Tufts<br>Cove Generating Station     | Dartmouth<br>(44°N, 63°W)  | 134 Km<br>northeast | 0     | 0    | 2205    | 2205   | 3054   | 3054   | 0     | 0    |
| Nova Scotia Power Incorporated –<br>Burnside Combustion Turbines    | Dartmouth<br>(44°N, 63°W)  | 134 Km<br>northeast | 0     | 0    | 0       | 0      | 60     | 40     | 0     | 0    |
| Maritime Paper Products LTD.                                        | Dartmouth<br>(44°N, 63°W)  | 134 Km<br>northeast | 0     | 0    | 7.2     | 0.868  | 3.1    | 2.1    | 0     | 0    |
| Capital Health – Victoria General<br>Hospital Central Heating Plant | Halifax<br>(44°N, 63°W)    | 134 Km<br>northeast | 0     | 0    | 215     | 7.6    | 60     | 19     | 0     | 0    |
| Capital Health – Nova Scotia Hospital<br>Central Heating Plant      | Halifax<br>(44°N, 63°W)    | 136 Km<br>northeast | 0     | 0    | 3.3     | 1.1    | 9.3    | 8.7    | 0     | 0    |
| Imperial oil-Darhmouth Refinery                                     | Dartmouth<br>(44°N, 63°W)  | 137Km<br>northeast  | 2.6   | 2.9  | 4231    | 3073   | 1543   | 1251   | 0.593 | 2.2  |
| Department of National Defence – 12<br>Wing Shearwater              | Shearwater<br>(44°N, 63°W) | 138 Km<br>northeast | 0     | 0    | 150     | 127    | 43     | 38     | 0     | 0    |
| Total emission                                                      |                            |                     | 2.78  | 3.05 | 8,455   | 6,988  | 5,647  | 5,193  | 0.593 | 2.2  |
| Provincial total emission                                           |                            |                     | 147.5 | 90.3 | 108,961 | 70,336 | 22,235 | 22,157 | 45.7  | 48.5 |

**Table S2.** Coefficients of cross-correlation among all variables in 2009 (bold numbers are significant at  $p < 0.05$ ).

|                               | GOM         | PBM         | PM          | O <sub>3</sub> | SO <sub>2</sub> | HNO <sub>3</sub> | Ca <sup>2+</sup> | K <sup>+</sup> | Na <sup>+</sup> | Mg <sup>2+</sup> | Cl <sup>-</sup> | NO <sub>3</sub> <sup>-</sup> | NH <sub>4</sub> <sup>+</sup> | SO <sub>4</sub> <sup>2-</sup> | Temperature  | Relative humidity | Wind speed  | Precipitation |
|-------------------------------|-------------|-------------|-------------|----------------|-----------------|------------------|------------------|----------------|-----------------|------------------|-----------------|------------------------------|------------------------------|-------------------------------|--------------|-------------------|-------------|---------------|
| GEM                           | <b>0.37</b> | <b>0.28</b> | 0.15        | <b>0.48</b>    | 0.11            | <b>0.18</b>      | 0.13             | 0.01           | 0.06            | 0.07             | -0.01           | 0.14                         | <b>0.18</b>                  | <b>0.24</b>                   | 0.03         | 0.06              | <b>0.24</b> | <b>0.17</b>   |
| GOM                           |             | 0.10        | <b>0.31</b> | <b>0.27</b>    | <b>0.21</b>     | <b>0.45</b>      | <b>0.39</b>      | <b>0.17</b>    | -0.09           | -0.02            | <b>-0.18</b>    | <b>0.17</b>                  | <b>0.28</b>                  | <b>0.27</b>                   | <b>0.46</b>  | <b>-0.38</b>      | -0.01       | -0.09         |
| PBM                           |             |             | <b>0.47</b> | <b>0.56</b>    | <b>0.63</b>     | <b>0.42</b>      | <b>0.28</b>      | 0.11           | <b>0.20</b>     | <b>0.23</b>      | 0.06            | <b>0.50</b>                  | <b>0.53</b>                  | <b>0.54</b>                   | <b>-0.43</b> | <b>-0.38</b>      | -0.09       | -0.15         |
| PM                            |             |             |             | <b>0.52</b>    | <b>0.64</b>     | <b>0.70</b>      | <b>0.68</b>      | <b>0.43</b>    | <b>0.37</b>     | <b>0.44</b>      | <b>0.19</b>     | <b>0.66</b>                  | <b>0.80</b>                  | <b>0.79</b>                   | <b>0.17</b>  | <b>-0.36</b>      | -0.05       | <b>-0.18</b>  |
| O <sub>3</sub>                |             |             |             |                | <b>0.49</b>     | <b>0.52</b>      | <b>0.51</b>      | 0.05           | <b>0.21</b>     | <b>0.26</b>      | 0.09            | <b>0.36</b>                  | <b>0.50</b>                  | <b>0.58</b>                   | <b>-0.17</b> | <b>-0.49</b>      | <b>0.20</b> | -0.09         |
| SO <sub>2</sub>               |             |             |             |                |                 | <b>0.80</b>      | <b>0.52</b>      | <b>0.29</b>    | <b>0.29</b>     | <b>0.34</b>      | 0.09            | <b>0.71</b>                  | <b>0.74</b>                  | <b>0.70</b>                   | <b>-0.21</b> | <b>-0.31</b>      | -0.10       | <b>-0.19</b>  |
| HNO <sub>3</sub>              |             |             |             |                |                 |                  | <b>0.67</b>      | <b>0.33</b>    | 0.16            | <b>0.23</b>      | -0.05           | <b>0.61</b>                  | <b>0.80</b>                  | <b>0.77</b>                   | <b>0.16</b>  | <b>-0.37</b>      | -0.13       | <b>-0.16</b>  |
| Ca <sup>2+</sup>              |             |             |             |                |                 |                  |                  | <b>0.47</b>    | <b>0.44</b>     | <b>0.53</b>      | <b>0.31</b>     | <b>0.59</b>                  | <b>0.57</b>                  | <b>0.58</b>                   | <b>0.23</b>  | <b>-0.37</b>      | 0.05        | -0.09         |
| K <sup>+</sup>                |             |             |             |                |                 |                  |                  |                | <b>0.64</b>     | <b>0.66</b>      | <b>0.57</b>     | <b>0.53</b>                  | <b>0.34</b>                  | <b>0.41</b>                   | <b>0.37</b>  | -0.04             | 0.14        | 0.03          |
| Na <sup>+</sup>               |             |             |             |                |                 |                  |                  |                |                 | <b>0.99</b>      | <b>0.96</b>     | <b>0.61</b>                  | <b>0.24</b>                  | <b>0.39</b>                   | -0.10        | 0.00              | <b>0.25</b> | -0.10         |
| Mg <sup>2+</sup>              |             |             |             |                |                 |                  |                  |                |                 |                  | <b>0.93</b>     | <b>0.64</b>                  | <b>0.30</b>                  | <b>0.45</b>                   | -0.06        | -0.06             | <b>0.25</b> | -0.11         |
| Cl <sup>-</sup>               |             |             |             |                |                 |                  |                  |                |                 |                  |                 | <b>0.38</b>                  | 0.02                         | <b>0.18</b>                   | -0.12        | 0.07              | <b>0.29</b> | -0.07         |
| NO <sub>3</sub> <sup>-</sup>  |             |             |             |                |                 |                  |                  |                |                 |                  |                 |                              | <b>0.72</b>                  | <b>0.68</b>                   | -0.02        | <b>-0.17</b>      | -0.01       | -0.13         |
| NH <sub>4</sub> <sup>+</sup>  |             |             |             |                |                 |                  |                  |                |                 |                  |                 |                              |                              | <b>0.94</b>                   | 0.12         | <b>-0.31</b>      | -0.09       | -0.13         |
| SO <sub>4</sub> <sup>2-</sup> |             |             |             |                |                 |                  |                  |                |                 |                  |                 |                              |                              |                               | 0.08         | <b>-0.31</b>      | 0.01        | -0.13         |
| Temperature                   |             |             |             |                |                 |                  |                  |                |                 |                  |                 |                              |                              |                               |              | -0.11             | 0.11        | 0.09          |
| Relative humidity             |             |             |             |                |                 |                  |                  |                |                 |                  |                 |                              |                              |                               |              |                   | <b>0.26</b> | <b>0.39</b>   |
| Wind speed                    |             |             |             |                |                 |                  |                  |                |                 |                  |                 |                              |                              |                               |              |                   |             | <b>0.39</b>   |

**Table S3.** Coefficients of cross-correlation among all variables in 2010 (bold numbers are significant at p<0.05).

|                               | GOM         | PBM         | O <sub>3</sub> | SO <sub>2</sub> | HNO <sub>3</sub> | Ca <sup>2+</sup> | K <sup>+</sup> | Na <sup>+</sup> | Mg <sup>2+</sup> | Cl <sup>-</sup> | NO <sub>3</sub> <sup>-</sup> | NH <sub>4</sub> <sup>+</sup> | SO <sub>4</sub> <sup>2-</sup> | Temperature  | Relative humidity | Wind speed   | Precipitation |
|-------------------------------|-------------|-------------|----------------|-----------------|------------------|------------------|----------------|-----------------|------------------|-----------------|------------------------------|------------------------------|-------------------------------|--------------|-------------------|--------------|---------------|
| GEM                           | <b>0.31</b> | 0.11        | <b>0.70</b>    | 0.02            | -0.11            | -0.01            | <b>-0.13</b>   | 0.09            | 0.08             | 0.10            | -0.01                        | -0.10                        | -0.11                         | <b>-0.48</b> | -0.02             | <b>0.38</b>  | <b>0.18</b>   |
| GOM                           |             | <b>0.29</b> | <b>0.55</b>    | <b>0.30</b>     | <b>0.24</b>      | 0.07             | 0.07           | -0.03           | -0.01            | -0.10           | <b>0.18</b>                  | 0.06                         | 0.06                          | -0.04        | <b>-0.66</b>      | -0.06        | <b>-0.18</b>  |
| PBM                           |             |             | <b>0.32</b>    | 0.06            | 0.04             | -0.02            | -0.03          | -0.07           | -0.07            | -0.08           | 0.03                         | 0.01                         | 0.00                          | <b>-0.16</b> | <b>-0.39</b>      | <b>-0.15</b> | <b>-0.22</b>  |
| O <sub>3</sub>                |             |             |                | <b>0.18</b>     | 0.11             | 0.02             | -0.07          | 0.05            | 0.05             | 0.01            | 0.06                         | 0.00                         | 0.02                          | <b>-0.29</b> | <b>-0.39</b>      | <b>0.31</b>  | 0.01          |
| SO <sub>2</sub>               |             |             |                |                 | <b>0.63</b>      | <b>0.13</b>      | <b>0.16</b>    | 0.05            | 0.09             | -0.04           | <b>0.25</b>                  | <b>0.26</b>                  | <b>0.31</b>                   | -0.03        | <b>-0.31</b>      | -0.10        | <b>-0.13</b>  |
| HNO <sub>3</sub>              |             |             |                |                 |                  | <b>0.25</b>      | <b>0.34</b>    | -0.11           | 0.00             | <b>-0.24</b>    | <b>0.28</b>                  | <b>0.48</b>                  | <b>0.53</b>                   | <b>0.33</b>  | <b>-0.25</b>      | <b>-0.23</b> | <b>-0.13</b>  |
| Ca <sup>2+</sup>              |             |             |                |                 |                  |                  | <b>0.57</b>    | 0.01            | <b>0.38</b>      | 0.00            | <b>0.70</b>                  | <b>0.78</b>                  | <b>0.71</b>                   | <b>0.19</b>  | -0.10             | -0.05        | -0.02         |
| K <sup>+</sup>                |             |             |                |                 |                  |                  |                | 0.09            | <b>0.33</b>      | 0.06            | <b>0.55</b>                  | <b>0.68</b>                  | <b>0.67</b>                   | <b>0.32</b>  | <b>-0.16</b>      | -0.08        | -0.07         |
| Na <sup>+</sup>               |             |             |                |                 |                  |                  |                |                 | <b>0.92</b>      | <b>0.96</b>     | <b>0.21</b>                  | -0.09                        | 0.02                          | <b>-0.16</b> | 0.08              | <b>0.28</b>  | -0.01         |
| Mg <sup>2+</sup>              |             |             |                |                 |                  |                  |                |                 |                  | <b>0.89</b>     | <b>0.45</b>                  | <b>0.21</b>                  | <b>0.28</b>                   | -0.08        | 0.04              | <b>0.24</b>  | -0.01         |
| Cl <sup>-</sup>               |             |             |                |                 |                  |                  |                |                 |                  |                 | 0.08                         | <b>-0.13</b>                 | -0.06                         | <b>-0.20</b> | <b>0.15</b>       | <b>0.32</b>  | 0.03          |
| NO <sub>3</sub> <sup>-</sup>  |             |             |                |                 |                  |                  |                |                 |                  |                 |                              | <b>0.68</b>                  | <b>0.64</b>                   | 0.10         | <b>-0.23</b>      | -0.05        | -0.11         |
| NH <sub>4</sub> <sup>+</sup>  |             |             |                |                 |                  |                  |                |                 |                  |                 |                              |                              | <b>0.97</b>                   | <b>0.28</b>  | <b>-0.15</b>      | <b>-0.14</b> | -0.09         |
| SO <sub>4</sub> <sup>2-</sup> |             |             |                |                 |                  |                  |                |                 |                  |                 |                              |                              |                               | <b>0.29</b>  | <b>-0.15</b>      | <b>-0.13</b> | -0.10         |
| Temperature                   |             |             |                |                 |                  |                  |                |                 |                  |                 |                              |                              |                               |              | -0.10             | <b>-0.19</b> | 0.03          |
| Relative humidity             |             |             |                |                 |                  |                  |                |                 |                  |                 |                              |                              |                               |              |                   | <b>0.24</b>  | <b>0.41</b>   |
| Wind speed                    |             |             |                |                 |                  |                  |                |                 |                  |                 |                              |                              |                               |              |                   |              | <b>0.47</b>   |

**Table S4.** PMF factor contributions to speciated Hg and ratios of predicted to observed annual Hg concentrations in 2009.

a) Case 2009

| Factor                                      |         | Combustion emission | Industrial sulfur | Photochemistry & re-emission | Sea salt |
|---------------------------------------------|---------|---------------------|-------------------|------------------------------|----------|
| GEM (%)                                     | Min     | 0                   | 0                 | 0                            | 0        |
|                                             | Max     | 20                  | 56                | 97                           | 97       |
|                                             | Average | 4                   | 6                 | 77                           | 14       |
|                                             | Median  | 2                   | 3                 | 83                           | 9        |
| Ratio of predicted to observed annual mean: |         |                     |                   |                              | 0.97     |
| GOM (%)                                     | Min     | 0                   | 0                 | 0                            | 0        |
|                                             | Max     | 100                 | 0                 | 100                          | 0        |
|                                             | Average | 25                  | 0                 | 70                           | 0        |
|                                             | Median  | 19                  | 0                 | 78                           | 0        |
| Ratio of predicted to observed annual mean: |         |                     |                   |                              | 0.86     |
| PBM (%)                                     | Min     | 0                   | 0                 | 0                            | 0        |
|                                             | Max     | 0                   | 93                | 100                          | 92       |
|                                             | Average | 0                   | 21                | 69                           | 9        |
|                                             | Median  | 0                   | 14                | 74                           | 5        |
| Ratio of predicted to observed annual mean: |         |                     |                   |                              | 1.03     |

b) Case 09+mean

| Factor                                      |         | Combustion emission | Industrial sulfur | Photochemistry & re-emission | Sea salt |
|---------------------------------------------|---------|---------------------|-------------------|------------------------------|----------|
| GEM (%)                                     | Min     | 0                   | 0                 | 0                            | 0        |
|                                             | Max     | 79                  | 34                | 98                           | 99       |
|                                             | Average | 5                   | 4                 | 78                           | 13       |
|                                             | Median  | 3                   | 2                 | 83                           | 7        |
| Ratio of predicted to observed annual mean: |         |                     |                   |                              | 0.94     |
| GOM (%)                                     | Min     | 0                   | 0                 | 0                            | 0        |
|                                             | Max     | 97                  | 0                 | 100                          | 0        |
|                                             | Average | 17                  | 0                 | 83                           | 0        |
|                                             | Median  | 12                  | 0                 | 88                           | 0        |
| Ratio of predicted to observed annual mean: |         |                     |                   |                              | 1.19     |
| PBM (%)                                     | Min     | 0                   | 0                 | 0                            | 0        |
|                                             | Max     | 0                   | 87                | 100                          | 94       |
|                                             | Average | 0                   | 23                | 67                           | 10       |
|                                             | Median  | 0                   | 19                | 71                           | 5        |
| Ratio of predicted to observed annual mean: |         |                     |                   |                              | 1.19     |

c) Case 09+median

| Factor  |         | Combustion emission | Industrial sulfur | Photochemistry & re-emission | Sea salt |
|---------|---------|---------------------|-------------------|------------------------------|----------|
| GEM (%) | Min     | 0                   | 0                 | 0                            | 0        |
|         | Max     | 89                  | 28                | 98                           | 99       |
|         | Average | 6                   | 3                 | 79                           | 13       |
|         | Median  | 3                   | 1                 | 83                           | 7        |

|                                             |         |    |     |     |      |
|---------------------------------------------|---------|----|-----|-----|------|
| Ratio of predicted to observed annual mean: |         |    |     |     | 0.93 |
| GOM (%)                                     | Min     | 0  | 0   | 0   | 0    |
|                                             | Max     | 95 | 100 | 100 | 0    |
|                                             | Average | 14 | 1   | 85  | 0    |
|                                             | Median  | 10 | 0   | 90  | 0    |
| Ratio of predicted to observed annual mean: |         |    |     |     | 1.20 |
| PBM (%)                                     | Min     | 0  | 0   | 0   | 0    |
|                                             | Max     | 0  | 86  | 100 | 96   |
|                                             | Average | 0  | 20  | 70  | 10   |
|                                             | Median  | 0  | 15  | 75  | 6    |
| Ratio of predicted to observed annual mean: |         |    |     |     | 1.14 |

d) Case 09+RM

| Factor                                      | Combustion emission | Industrial sulfur | Photochemistry & re-emission | Sea salt |      |
|---------------------------------------------|---------------------|-------------------|------------------------------|----------|------|
| GEM (%)                                     | Min                 | 0                 | 0                            | 0        |      |
|                                             | Max                 | 16                | 54                           | 98       |      |
|                                             | Average             | 3                 | 5                            | 78       |      |
|                                             | Median              | 2                 | 2                            | 83       |      |
| Ratio of predicted to observed annual mean: |                     |                   |                              |          | 0.97 |
| RM (%)                                      | Min                 | 0                 | 0                            | 0        |      |
|                                             | Max                 | 37                | 83                           | 100      |      |
|                                             | Average             | 10                | 16                           | 73       |      |
|                                             | Median              | 7                 | 11                           | 78       |      |
| Ratio of predicted to observed annual mean: |                     |                   |                              |          | 1.04 |

e) Case 09-RM

| Factor                                      | Combustion emission | Industrial sulfur | Photochemistry & re-emission | Sea salt |      |
|---------------------------------------------|---------------------|-------------------|------------------------------|----------|------|
| GEM (%)                                     | Min                 | 0                 | 0                            | 0        |      |
|                                             | Max                 | 34                | 15                           | 98       |      |
|                                             | Average             | 7                 | 1                            | 79       |      |
|                                             | Median              | 4                 | 1                            | 84       |      |
| Ratio of predicted to observed annual mean: |                     |                   |                              |          | 0.97 |

f) Case 09ScaleRM

| Factor name                                 | Combustion emission | Industrial sulfur | Photochemistry & re-emission | Sea salt |      |
|---------------------------------------------|---------------------|-------------------|------------------------------|----------|------|
| GEM (%)                                     | Min                 | 0                 | 0                            | 0        |      |
|                                             | Max                 | 0                 | 65                           | 100      |      |
|                                             | Average             | 0                 | 7                            | 78       |      |
|                                             | Median              | 0                 | 4                            | 83       |      |
| Ratio of predicted to observed annual mean: |                     |                   |                              |          | 0.97 |
| GOM (%)                                     | Min                 | 0                 | 0                            | 0        |      |
|                                             | Max                 | 97                | 0                            | 100      |      |
|                                             | Average             | 23                | 0                            | 75       |      |
|                                             | Median              | 18                | 0                            | 81       |      |
| Ratio of predicted to observed annual mean: |                     |                   |                              |          | 0.75 |

|                                             |         |   |    |     |      |
|---------------------------------------------|---------|---|----|-----|------|
|                                             | Min     | 0 | 0  | 0   | 0    |
| PBM                                         | Max     | 0 | 88 | 100 | 96   |
| (%)                                         | Average | 0 | 16 | 74  | 10   |
|                                             | Median  | 0 | 10 | 80  | 6    |
| Ratio of predicted to observed annual mean: |         |   |    |     | 0.94 |



**Table S5.** PMF factor contributions to speciated Hg and ratios of predicted to observed annual Hg concentrations in 2010.

a) Case 2010

| Factor                                      |         | Combustion emission | Industrial sulfur | Photochemistry & re-emission | Sea salt |
|---------------------------------------------|---------|---------------------|-------------------|------------------------------|----------|
| GEM (%)                                     | Min     | 0                   | 0                 | 0                            | 0        |
|                                             | Max     | 100                 | 9                 | 99                           | 100      |
|                                             | Average | 11                  | 1                 | 79                           | 9        |
|                                             | Median  | 7                   | 1                 | 85                           | 4        |
| Ratio of predicted to observed annual mean: |         |                     |                   |                              | 0.98     |
| GOM (%)                                     | Min     | 0                   | 0                 | 0                            | 0        |
|                                             | Max     | 100                 | 100               | 100                          | 0        |
|                                             | Average | 5                   | 29                | 67                           | 0        |
|                                             | Median  | 2                   | 28                | 68                           | 0        |
| Ratio of predicted to observed annual mean: |         |                     |                   |                              | 1.34     |
| PBM (%)                                     | Min     | 0                   | 0                 | 0                            | 0        |
|                                             | Max     | 100                 | 28                | 98                           | 99       |
|                                             | Average | 11                  | 4                 | 80                           | 5        |
|                                             | Median  | 6                   | 3                 | 86                           | 2        |
| Ratio of predicted to observed annual mean: |         |                     |                   |                              | 1.00     |

b) Case 10+mean

| Factor                                      |         | Combustion emission | Industrial sulfur | Photochemistry & re-emission | Sea salt |
|---------------------------------------------|---------|---------------------|-------------------|------------------------------|----------|
| GEM (%)                                     | Min     | 0                   | 0                 | 0                            | 0        |
|                                             | Max     | 28                  | 70                | 98                           | 100      |
|                                             | Average | 3                   | 6                 | 83                           | 8        |
|                                             | Median  | 2                   | 3                 | 88                           | 4        |
| Ratio of predicted to observed annual mean: |         |                     |                   |                              | 0.96     |
| GOM (%)                                     | Min     | 0                   | 0                 | 0                            | 0        |
|                                             | Max     | 22                  | 100               | 100                          | 0        |
|                                             | Average | 2                   | 28                | 70                           | 0        |
|                                             | Median  | 1                   | 22                | 76                           | 0        |
| Ratio of predicted to observed annual mean: |         |                     |                   |                              | 1.35     |
| PBM (%)                                     | Min     | 0                   | 0                 | 0                            | 0        |
|                                             | Max     | 0                   | 85                | 100                          | 99       |
|                                             | Average | 0                   | 4                 | 93                           | 2        |
|                                             | Median  | 0                   | 2                 | 97                           | 1        |
| Ratio of predicted to observed annual mean: |         |                     |                   |                              | 0.87     |

c) Case 10+median

| Factor  |         | Combustion emission | Industrial sulfur | Photochemistry & re-emission | Sea salt |
|---------|---------|---------------------|-------------------|------------------------------|----------|
| GEM (%) | Min     | 0                   | 0                 | 0                            | 0        |
|         | Max     | 39                  | 0                 | 100                          | 100      |
|         | Average | 3                   | 0                 | 88                           | 8        |
|         | Median  | 2                   | 0                 | 93                           | 4        |

|                                             |         |     |     |     |      |     |
|---------------------------------------------|---------|-----|-----|-----|------|-----|
| Ratio of predicted to observed annual mean: |         |     |     |     | 0.97 |     |
| GOM (%)                                     | Factor  | Min | 0   | 0   | 0    | 0   |
|                                             | Max     | 0   | 100 | 100 | 100  | 0   |
|                                             | Average | 0   | 36  | 64  | 64   | 0   |
|                                             | Median  | 0   | 38  | 62  | 62   | 0   |
| Ratio of predicted to observed annual mean: |         |     |     |     | 1.32 |     |
| PBM (%)                                     | Factor  | Min | 0   | 0   | 0    | 0   |
|                                             | Max     | 0   | 0   | 100 | 100  | 100 |
|                                             | Average | 0   | 0   | 97  | 97   | 3   |
|                                             | Median  | 0   | 0   | 99  | 99   | 1   |
| Ratio of predicted to observed annual mean: |         |     |     |     | 0.88 |     |

d) Case 10+RM

|                                             |         |     |    |    |    |      |
|---------------------------------------------|---------|-----|----|----|----|------|
| Ratio of predicted to observed annual mean: |         |     |    |    |    | 0.98 |
| GEM (%)                                     | Factor  | Min | 0  | 0  | 0  | 0    |
|                                             | Max     | 100 | 9  | 99 | 99 | 100  |
|                                             | Average | 11  | 1  | 79 | 79 | 9    |
|                                             | Median  | 7   | 1  | 85 | 85 | 4    |
| Ratio of predicted to observed annual mean: |         |     |    |    |    | 0.98 |
| RM (%)                                      | Factor  | Min | 0  | 0  | 0  | 0    |
|                                             | Max     | 100 | 47 | 98 | 98 | 96   |
|                                             | Average | 9   | 8  | 80 | 80 | 3    |
|                                             | Median  | 5   | 6  | 86 | 86 | 1    |
| Ratio of predicted to observed annual mean: |         |     |    |    |    | 1.16 |

e) Case 10-RM

|                                             |         |     |    |    |    |      |
|---------------------------------------------|---------|-----|----|----|----|------|
| Ratio of predicted to observed annual mean: |         |     |    |    |    | 0.98 |
| GEM (%)                                     | Factor  | Min | 0  | 0  | 0  | 0    |
|                                             | Max     | 100 | 10 | 99 | 99 | 100  |
|                                             | Average | 11  | 1  | 78 | 78 | 9    |
|                                             | Median  | 7   | 1  | 85 | 85 | 4    |
| Ratio of predicted to observed annual mean: |         |     |    |    |    | 0.98 |

f) Case 10ScaleRM

|                                             |         |     |    |    |    |      |
|---------------------------------------------|---------|-----|----|----|----|------|
| Ratio of predicted to observed annual mean: |         |     |    |    |    | 0.98 |
| GEM (%)                                     | Factor  | Min | 0  | 0  | 0  | 0    |
|                                             | Max     | 100 | 10 | 99 | 99 | 100  |
|                                             | Average | 11  | 1  | 78 | 78 | 9    |
|                                             | Median  | 7   | 1  | 85 | 85 | 4    |
| Ratio of predicted to observed annual mean: |         |     |    |    |    | 0.98 |
| GOM (%)                                     | Factor  | Min | 0  | 0  | 0  | 0    |
|                                             | Max     | 100 | 69 | 99 | 99 | 75   |
|                                             | Average | 8   | 14 | 77 | 77 | 1    |
|                                             | Median  | 4   | 11 | 80 | 80 | 0    |
| Ratio of predicted to observed annual mean: |         |     |    |    |    | 1.23 |

|                                             |         |     |    |    |      |
|---------------------------------------------|---------|-----|----|----|------|
|                                             | Min     | 0   | 0  | 0  | 0    |
| PBM                                         | Max     | 100 | 40 | 97 | 98   |
| (%)                                         | Average | 12  | 6  | 76 | 6    |
|                                             | Median  | 7   | 4  | 82 | 2    |
| Ratio of predicted to observed annual mean: |         |     |    |    | 0.88 |

**Table S6.** Pearson correlation coefficients between Hg forms and other compounds in Case 2009, Case 09+mean, and Case 09+median (bold numbers are significant at <0.05).

|                               | GEM200<br>9 | GEM09+<br>mean | GEM09+<br>median | GOM200<br>9  | GOM09+<br>mean | GOM09+<br>median | PBM200<br>9 | PBM09+<br>mean | PBM09+<br>median |
|-------------------------------|-------------|----------------|------------------|--------------|----------------|------------------|-------------|----------------|------------------|
| GEM                           | 1.00        | 1.00           | 1.00             | <b>0.37</b>  | <b>0.37</b>    | <b>0.35</b>      | <b>0.28</b> | <b>0.35</b>    | <b>0.35</b>      |
| GOM                           | <b>0.37</b> | <b>0.37</b>    | <b>0.35</b>      | 1.00         | 1.00           | 1.00             | 0.11        | <b>0.20</b>    | <b>0.19</b>      |
| PBM                           | <b>0.28</b> | <b>0.35</b>    | <b>0.35</b>      | 0.11         | <b>0.20</b>    | <b>0.19</b>      | 1.00        | 1.00           | 1.00             |
| PM                            | 0.15        | <b>0.11</b>    | <b>0.12</b>      | <b>0.31</b>  | <b>0.19</b>    | <b>0.18</b>      | <b>0.48</b> | <b>0.30</b>    | <b>0.31</b>      |
| O <sub>3</sub>                | <b>0.48</b> | <b>0.52</b>    | <b>0.50</b>      | <b>0.28</b>  | <b>0.24</b>    | <b>0.25</b>      | <b>0.56</b> | <b>0.44</b>    | <b>0.45</b>      |
| SO <sub>2</sub>               | 0.11        | <b>0.16</b>    | <b>0.16</b>      | <b>0.21</b>  | <b>0.19</b>    | <b>0.19</b>      | <b>0.63</b> | <b>0.51</b>    | <b>0.52</b>      |
| HNO <sub>3</sub>              | <b>0.18</b> | <b>0.14</b>    | <b>0.16</b>      | <b>0.45</b>  | <b>0.27</b>    | <b>0.27</b>      | <b>0.42</b> | <b>0.27</b>    | <b>0.29</b>      |
| Ca <sup>2+</sup>              | 0.13        | 0.10           | 0.09             | <b>0.39</b>  | <b>0.36</b>    | <b>0.36</b>      | <b>0.28</b> | <b>0.26</b>    | <b>0.26</b>      |
| K <sup>+</sup>                | 0.01        | 0.03           | 0.02             | <b>0.17</b>  | <b>0.17</b>    | <b>0.17</b>      | 0.11        | <b>0.14</b>    | <b>0.13</b>      |
| Na <sup>+</sup>               | 0.06        | <b>0.12</b>    | 0.10             | -0.09        | -0.03          | -0.02            | <b>0.20</b> | <b>0.22</b>    | <b>0.21</b>      |
| Mg <sup>2+</sup>              | 0.07        | <b>0.12</b>    | <b>0.10</b>      | -0.01        | 0.03           | 0.04             | <b>0.23</b> | <b>0.24</b>    | <b>0.23</b>      |
| Cl <sup>-</sup>               | -0.01       | 0.06           | 0.04             | <b>-0.18</b> | -0.09          | -0.08            | 0.06        | <b>0.11</b>    | 0.10             |
| NO <sub>3</sub> <sup>-</sup>  | 0.14        | <b>0.15</b>    | <b>0.13</b>      | <b>0.17</b>  | <b>0.15</b>    | <b>0.15</b>      | <b>0.49</b> | <b>0.41</b>    | <b>0.41</b>      |
| NH <sub>4</sub> <sup>+</sup>  | <b>0.18</b> | <b>0.12</b>    | <b>0.14</b>      | <b>0.28</b>  | 0.10           | 0.09             | <b>0.53</b> | <b>0.22</b>    | <b>0.24</b>      |
| SO <sub>4</sub> <sup>2-</sup> | <b>0.24</b> | <b>0.13</b>    | <b>0.15</b>      | <b>0.27</b>  | 0.06           | 0.05             | <b>0.53</b> | <b>0.17</b>    | <b>0.19</b>      |

**Table S7.** Pearson correlation coefficients between Hg forms and other compounds in Case 2010, Case 10+mean, and Case 10+median (bold numbers are significant at <0.05).

|                               | GEM201<br>0  | GEM10+<br>mean | GEM10+<br>median | GOM201<br>0 | GOM10+<br>mean | GOM10+<br>median | PBM201<br>0 | PBM10+<br>mean | PBM10+<br>median |
|-------------------------------|--------------|----------------|------------------|-------------|----------------|------------------|-------------|----------------|------------------|
| GEM                           | 1.00         | 1.00           | 1.00             | <b>0.32</b> | <b>0.29</b>    | <b>0.29</b>      | 0.11        | <b>0.19</b>    | <b>0.19</b>      |
| GOM                           | <b>0.32</b>  | <b>0.29</b>    | <b>0.29</b>      | 1.00        | 1.00           | 1.00             | <b>0.29</b> | <b>0.15</b>    | <b>0.15</b>      |
| PBM                           | 0.11         | <b>0.19</b>    | <b>0.19</b>      | <b>0.29</b> | <b>0.15</b>    | <b>0.15</b>      | 1.00        | 1.00           | 1.00             |
| O <sub>3</sub>                | <b>0.70</b>  | <b>0.68</b>    | <b>0.68</b>      | <b>0.56</b> | <b>0.51</b>    | <b>0.51</b>      | <b>0.32</b> | <b>0.29</b>    | <b>0.29</b>      |
| SO <sub>2</sub>               | 0.01         | 0.00           | 0.00             | <b>0.29</b> | <b>0.29</b>    | <b>0.29</b>      | 0.05        | -0.04          | -0.03            |
| HNO <sub>3</sub>              | <b>-0.12</b> | <b>-0.11</b>   | <b>-0.11</b>     | <b>0.23</b> | <b>0.24</b>    | <b>0.24</b>      | 0.04        | -0.04          | -0.04            |
| Ca <sup>2+</sup>              | -0.01        | -0.02          | -0.02            | 0.07        | 0.08           | 0.09             | -0.02       | -0.05          | -0.05            |
| K <sup>+</sup>                | <b>-0.13</b> | <b>-0.12</b>   | <b>-0.13</b>     | 0.07        | 0.09           | 0.10             | -0.03       | -0.07          | -0.08            |
| Na <sup>+</sup>               | 0.08         | 0.07           | 0.06             | -0.03       | 0.00           | -0.01            | -0.07       | <b>-0.10</b>   | -0.09            |
| Mg <sup>2+</sup>              | 0.07         | 0.06           | 0.06             | -0.01       | 0.02           | 0.02             | -0.07       | -0.10          | -0.09            |
| Cl <sup>-</sup>               | 0.09         | 0.07           | 0.07             | -0.10       | -0.07          | -0.07            | -0.07       | <b>-0.11</b>   | <b>-0.11</b>     |
| NO <sub>3</sub> <sup>-</sup>  | -0.02        | -0.02          | -0.03            | <b>0.18</b> | <b>0.19</b>    | <b>0.20</b>      | 0.03        | -0.03          | -0.04            |
| NH <sub>4</sub> <sup>+</sup>  | -0.11        | -0.10          | <b>-0.10</b>     | 0.06        | 0.08           | 0.08             | 0.01        | -0.04          | -0.04            |
| SO <sub>4</sub> <sup>2-</sup> | -0.11        | -0.10          | <b>-0.11</b>     | 0.06        | 0.08           | 0.08             | 0.00        | -0.05          | -0.05            |

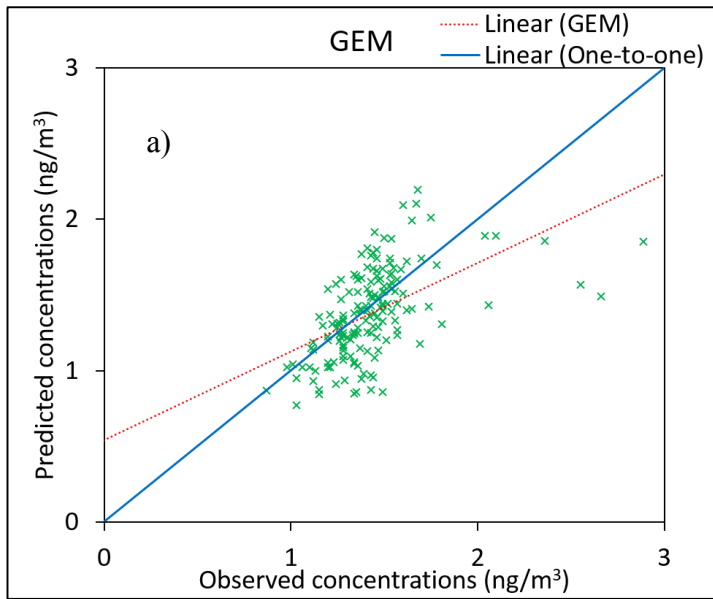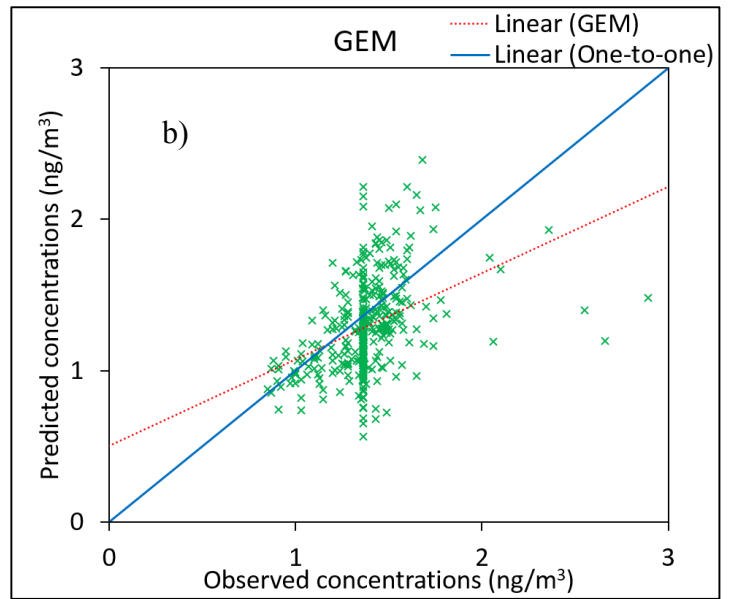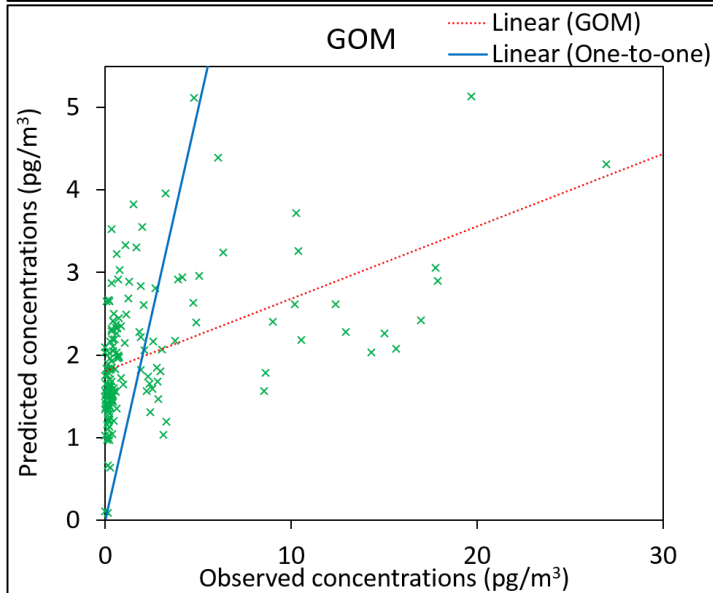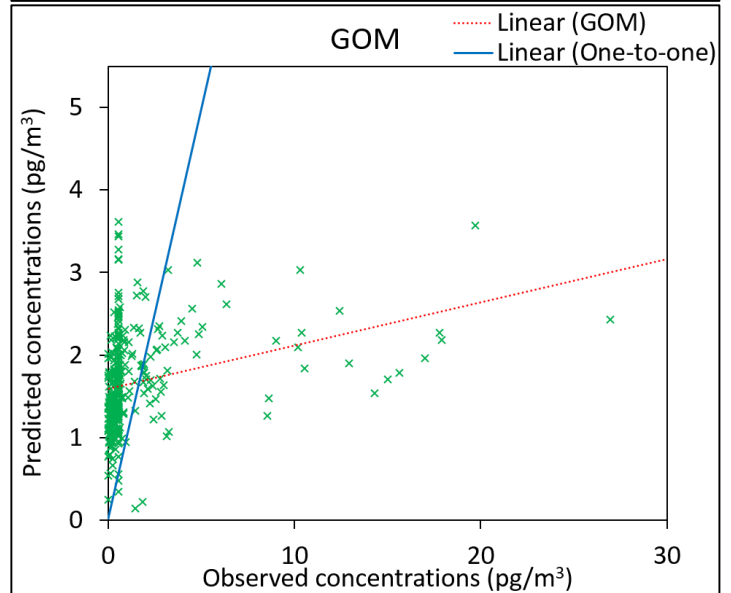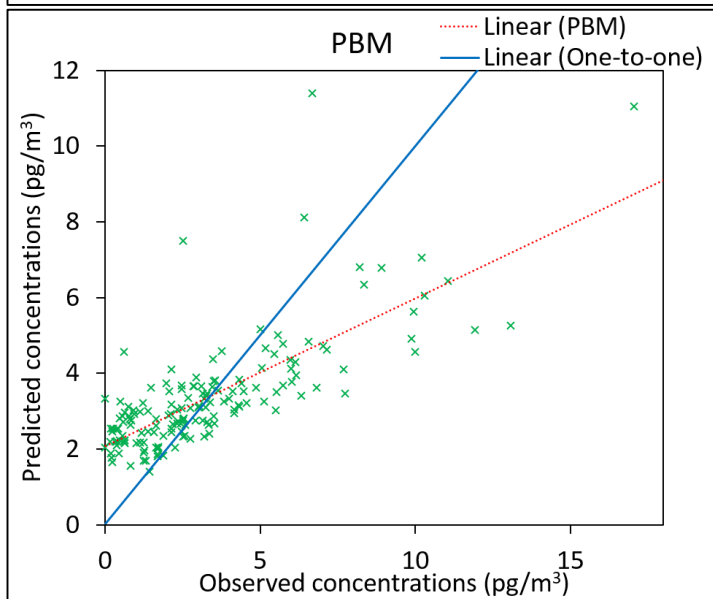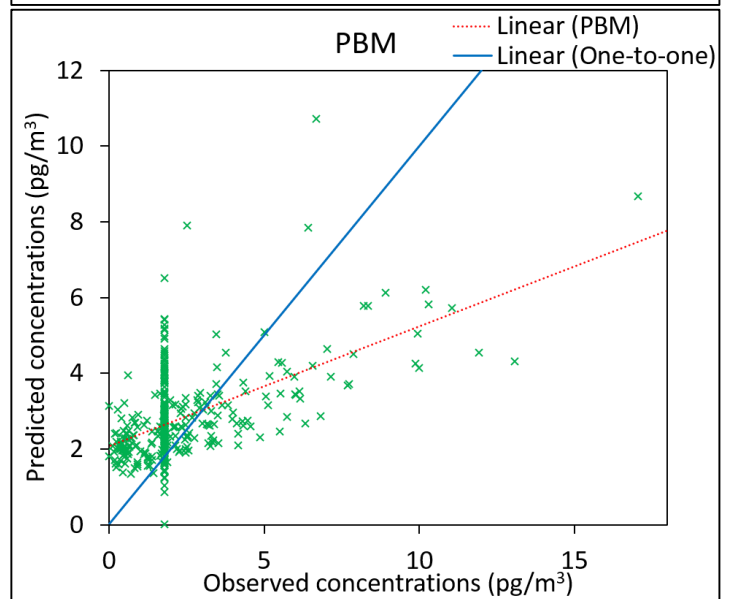

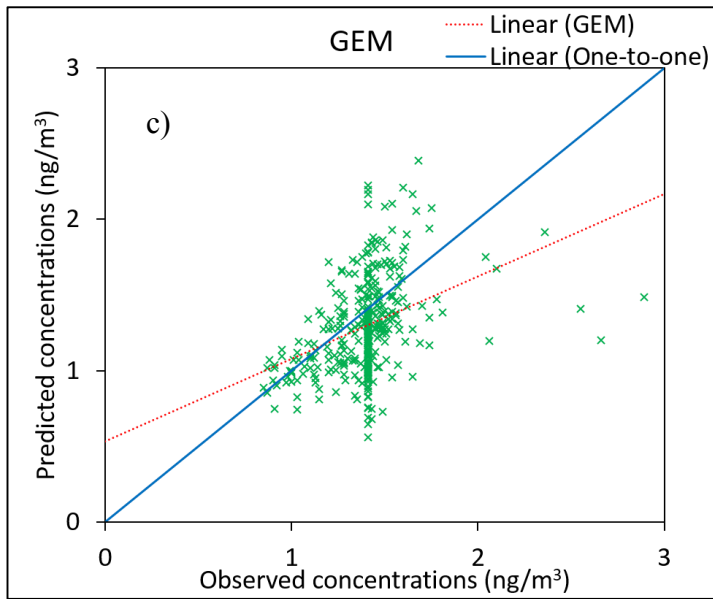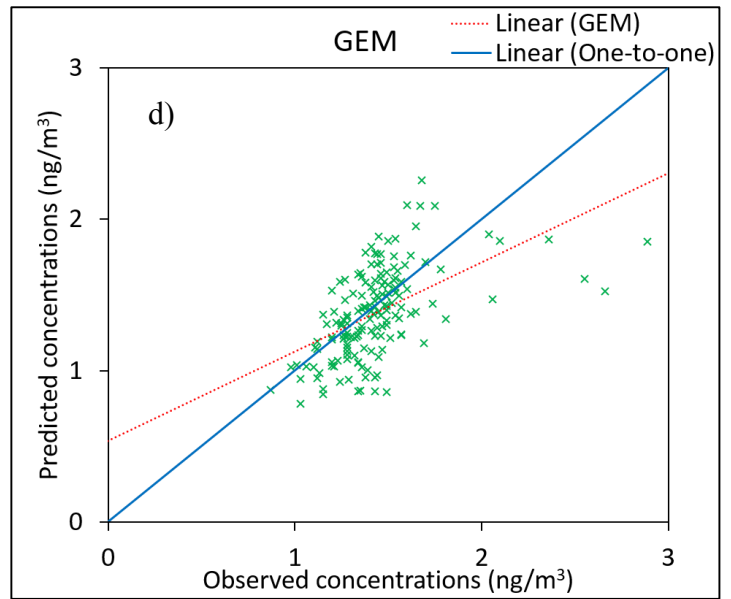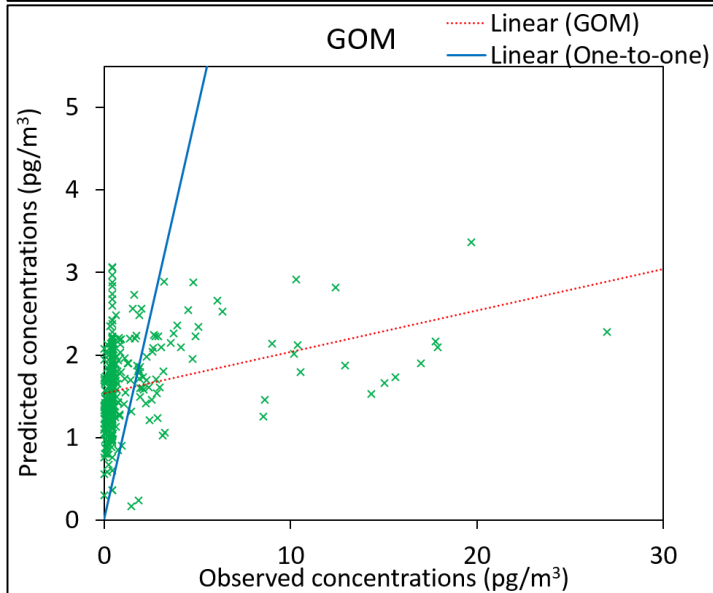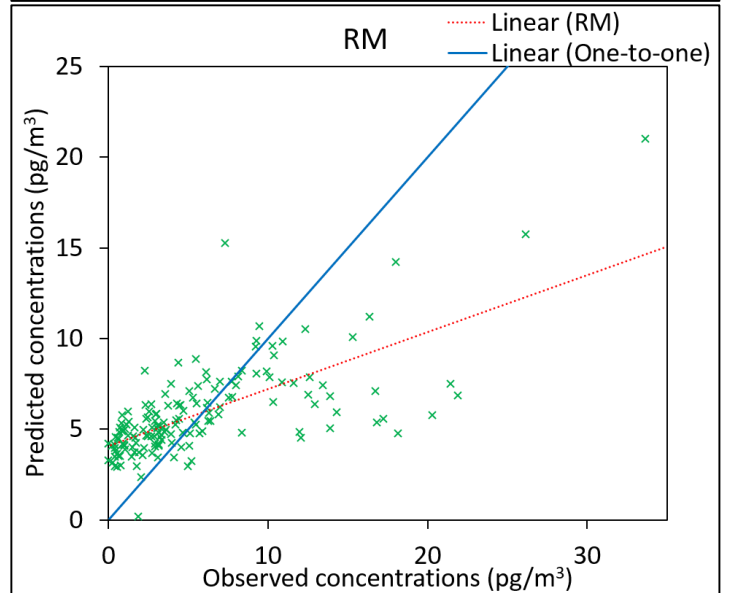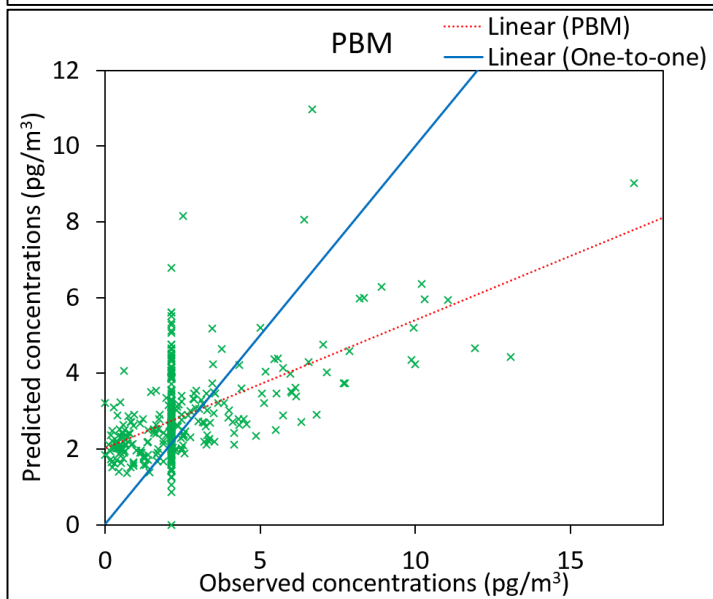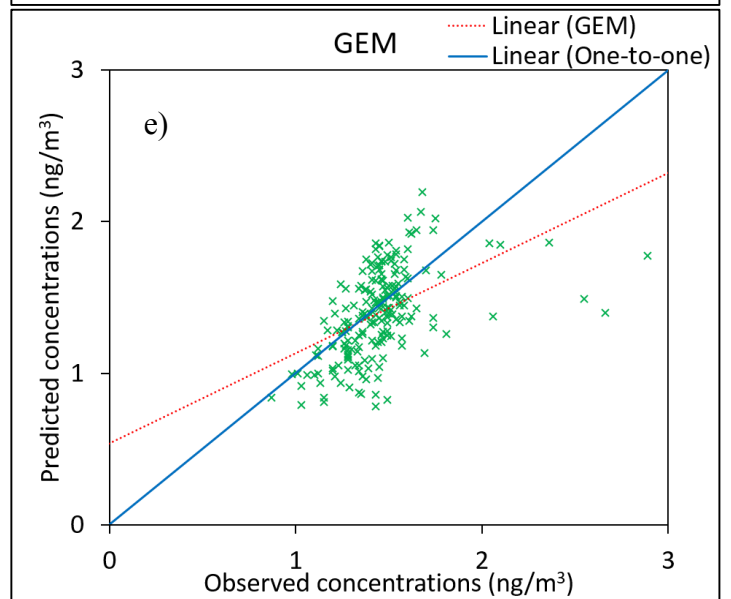

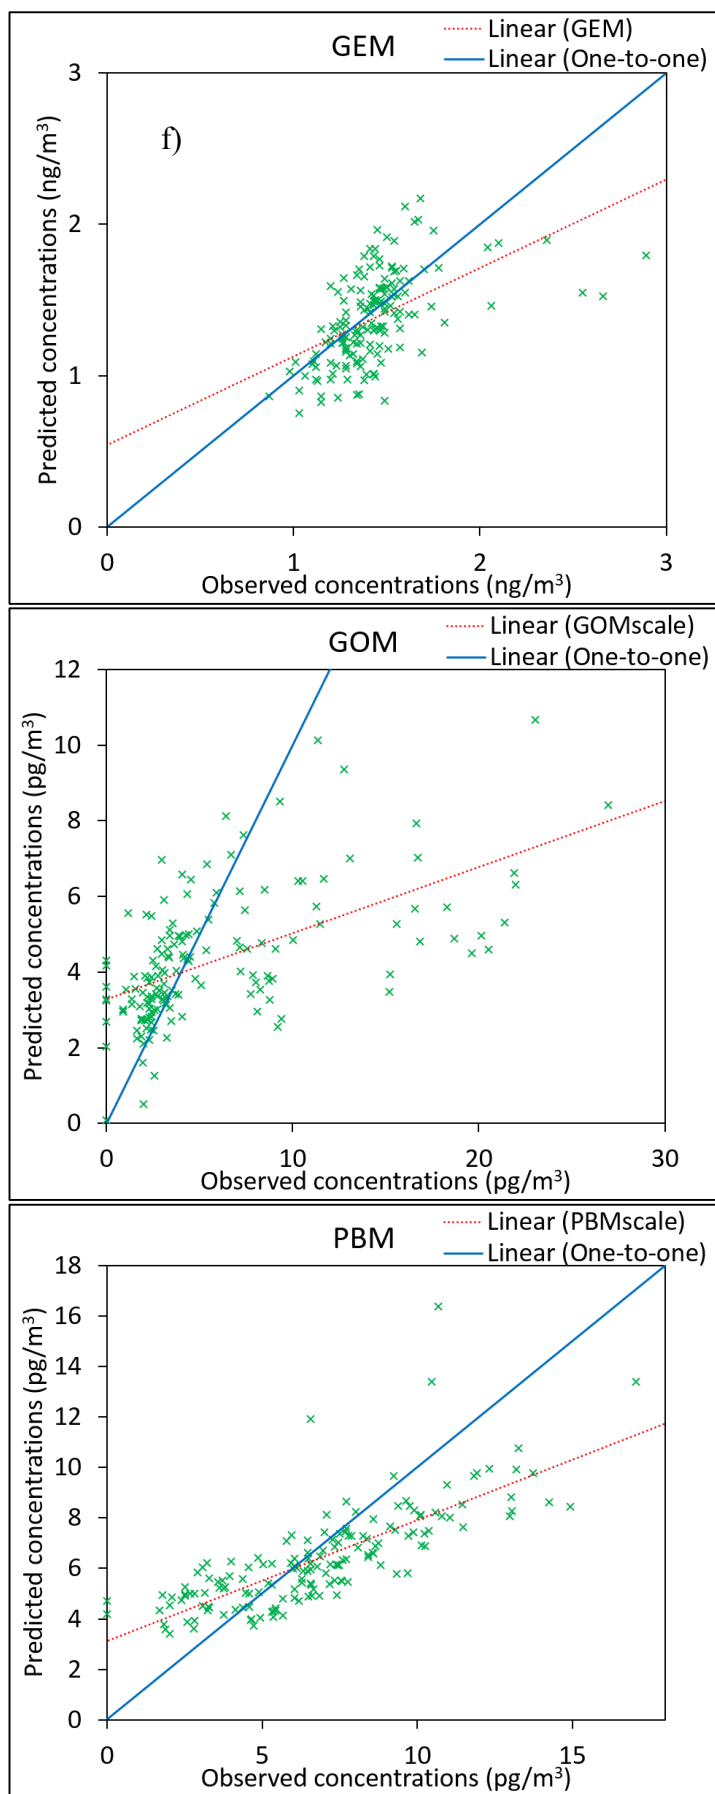

**Figure S1.** Obs/Pred scatter plot in 2009. a) Case 2009, b) Case 09+mean, c) Case 09+median, d) Case 09+RM, e) Case 09-RM, and f) Case 09ScaleRM, observed GOM and PBM have been scaled.



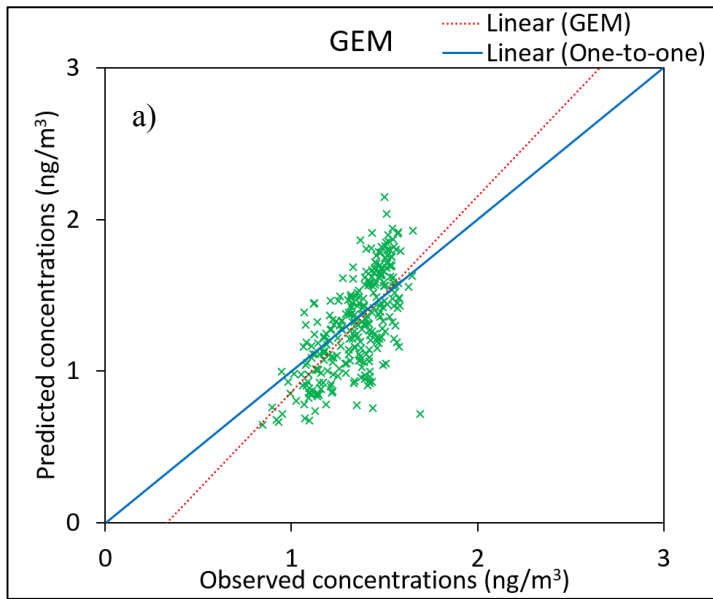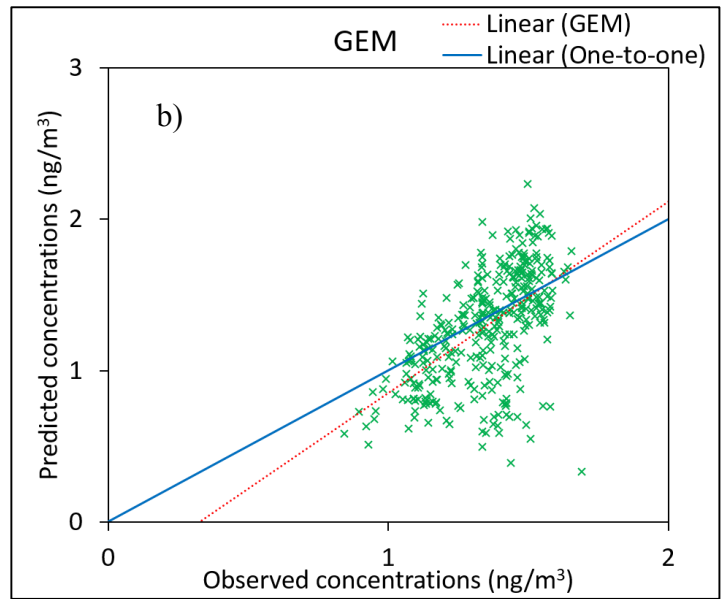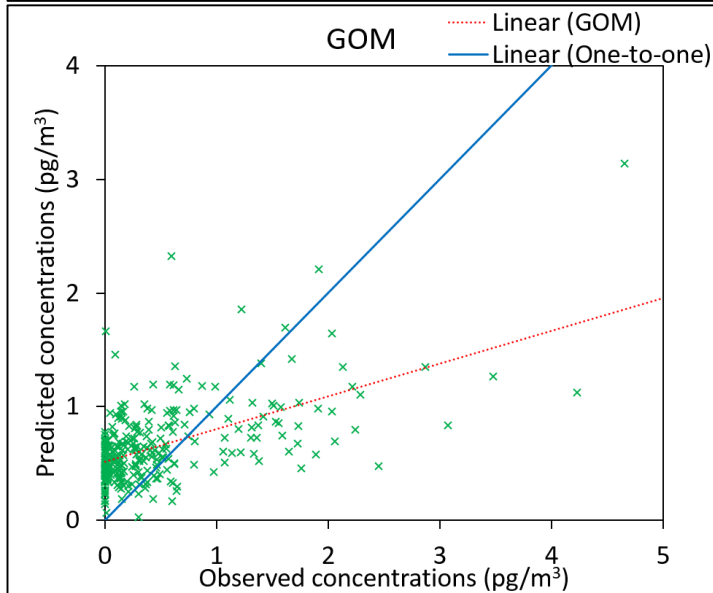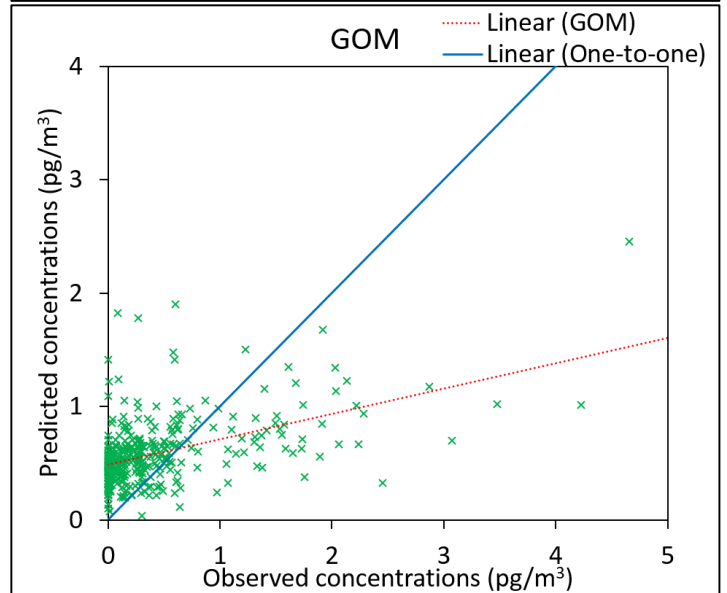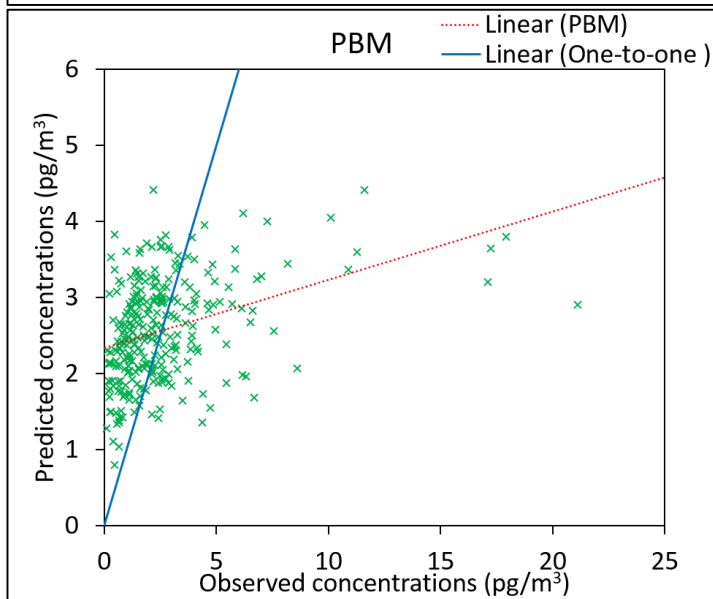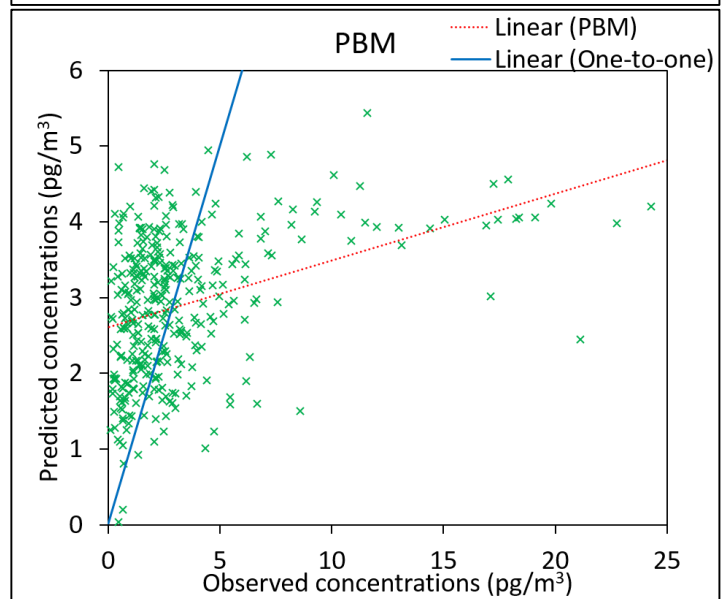

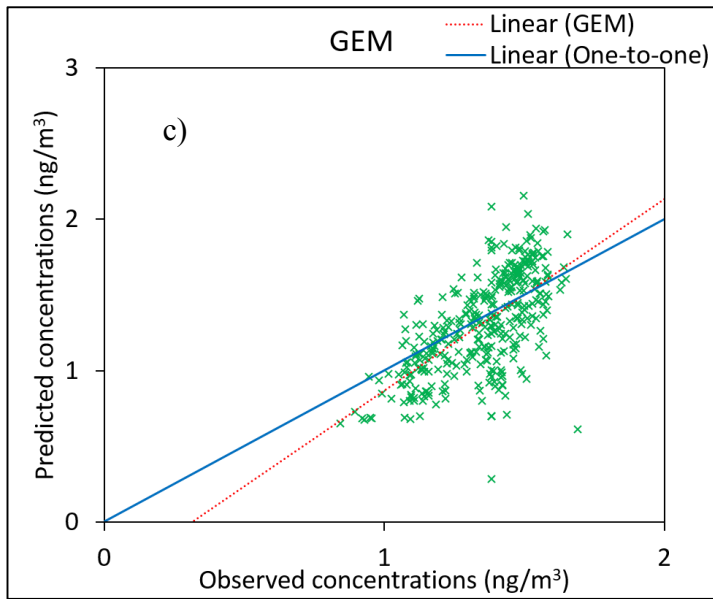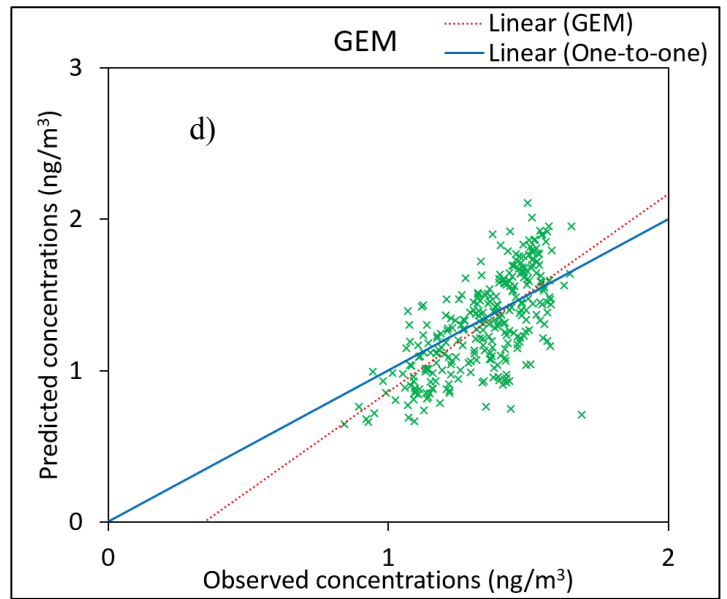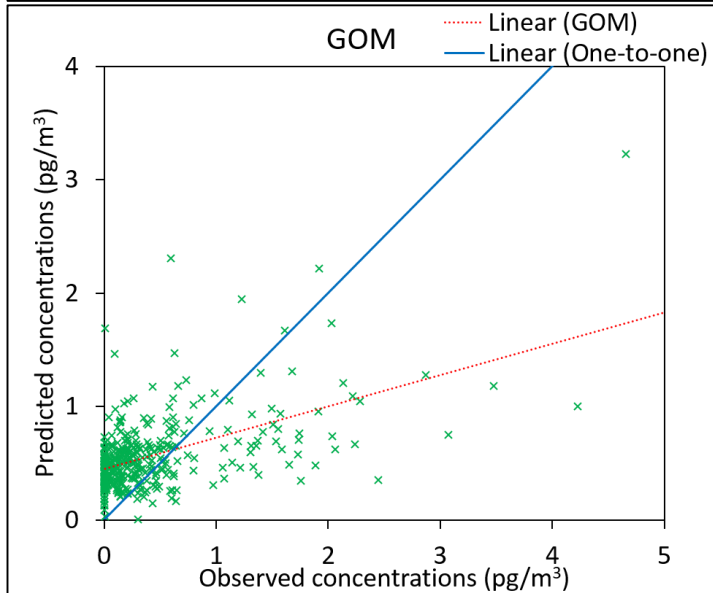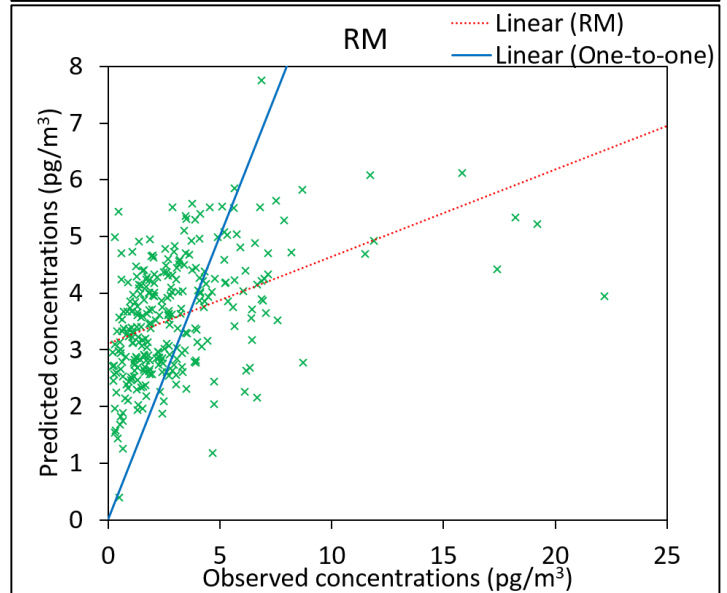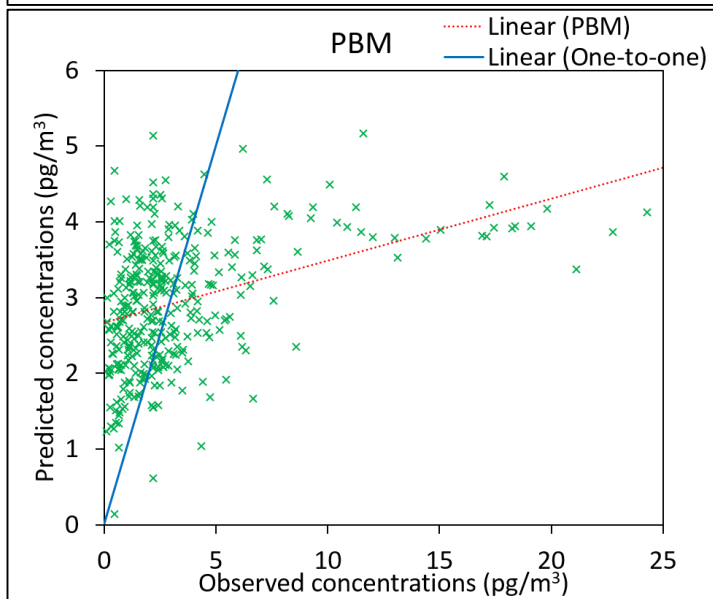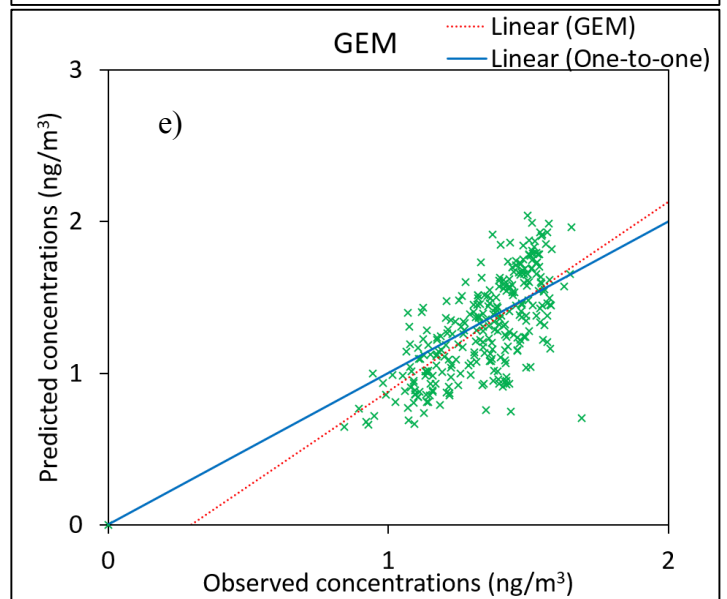

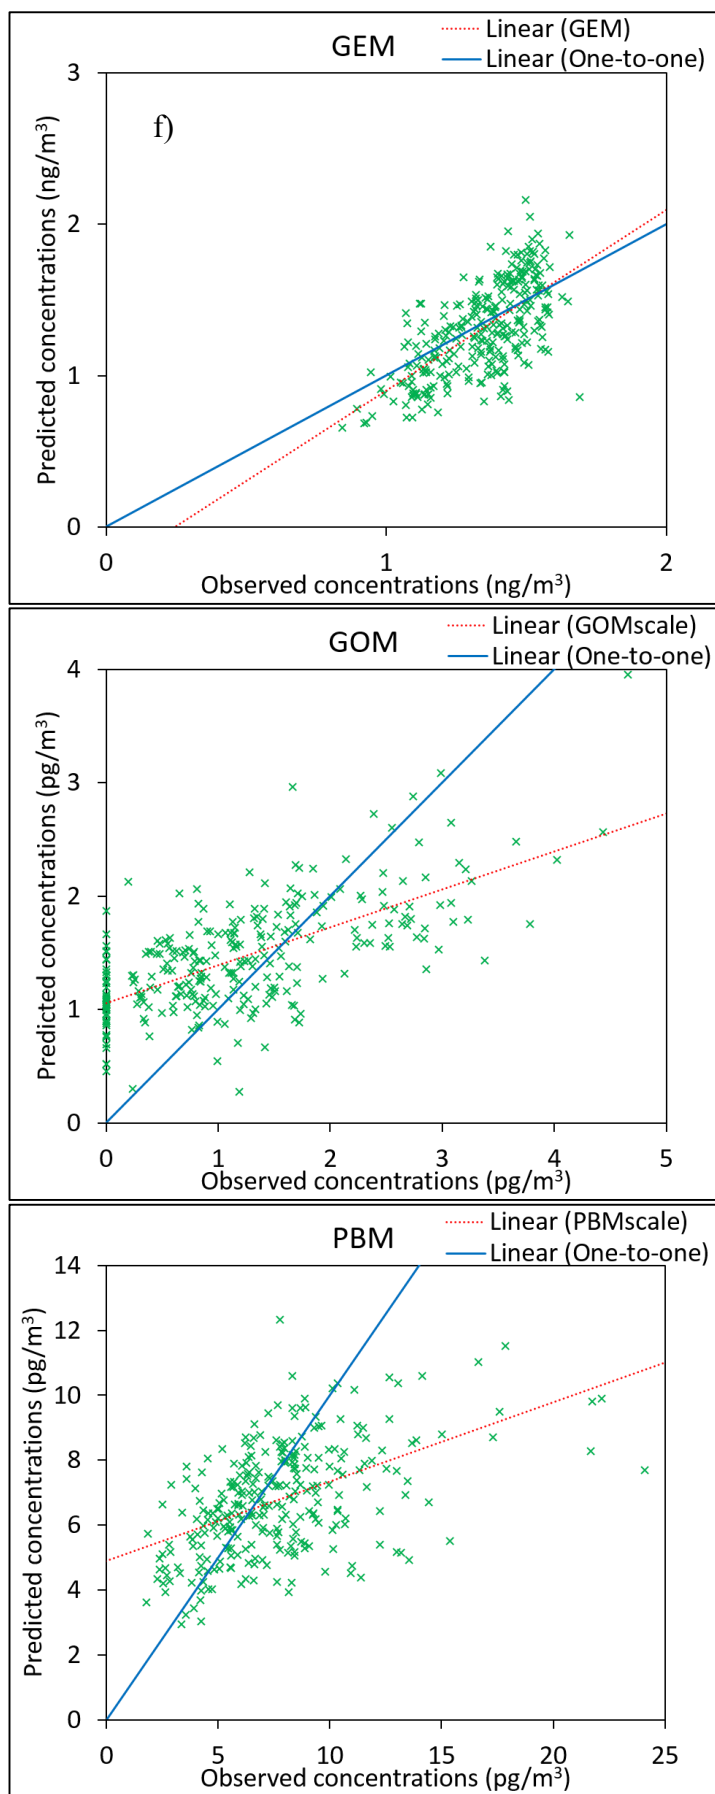

**Figure S2.** Obs/Pred scatter plot in 2010. a) Case 2010, b) Case 10+mean, c) Case 10+median, d) Case 10+RM, e) Case 10-RM, and f) Case 10ScaleRM, observed GOM and PBM have been scaled.

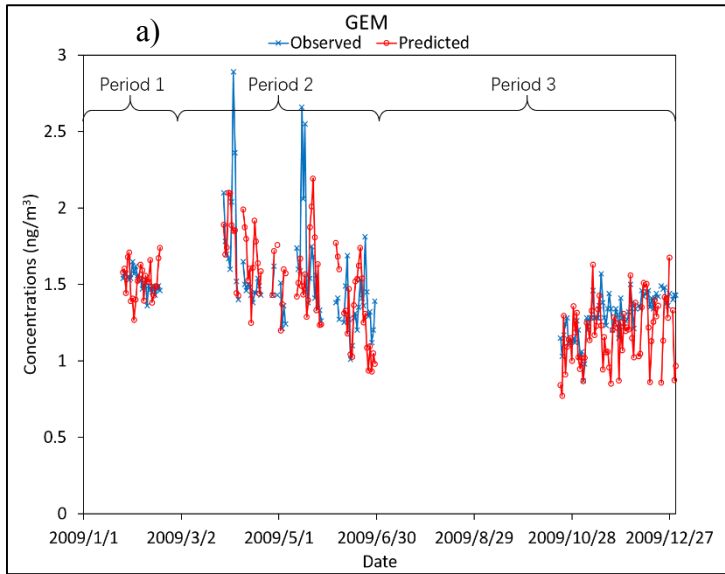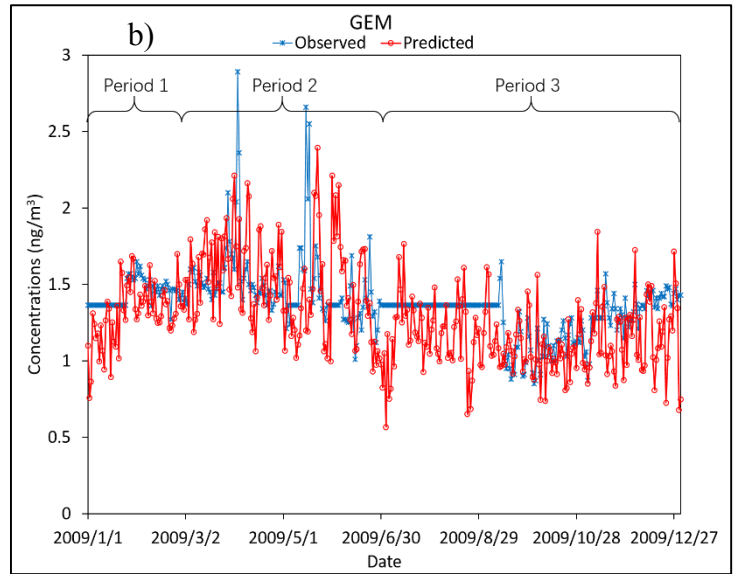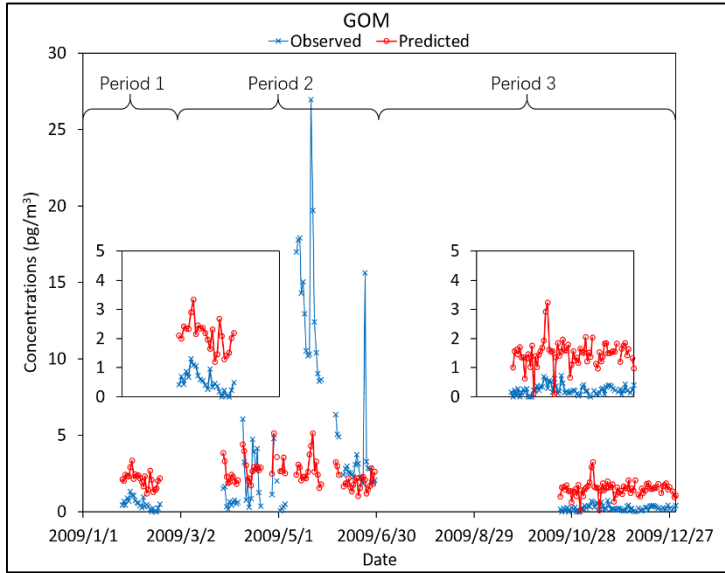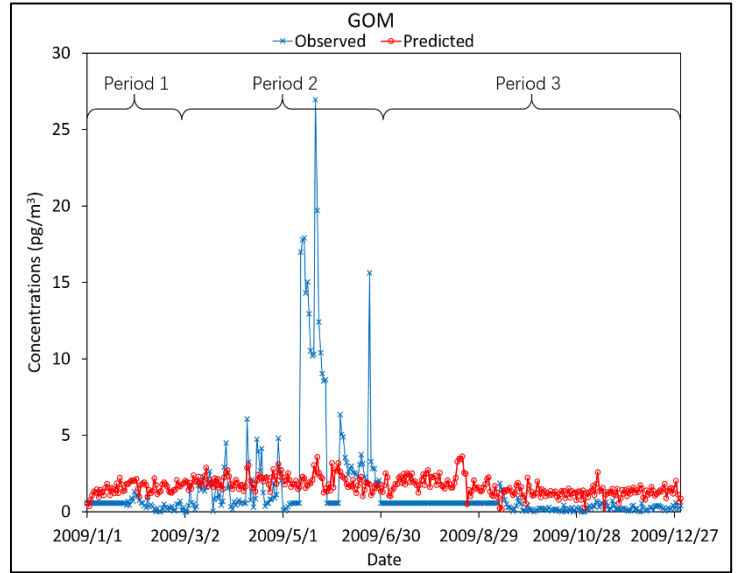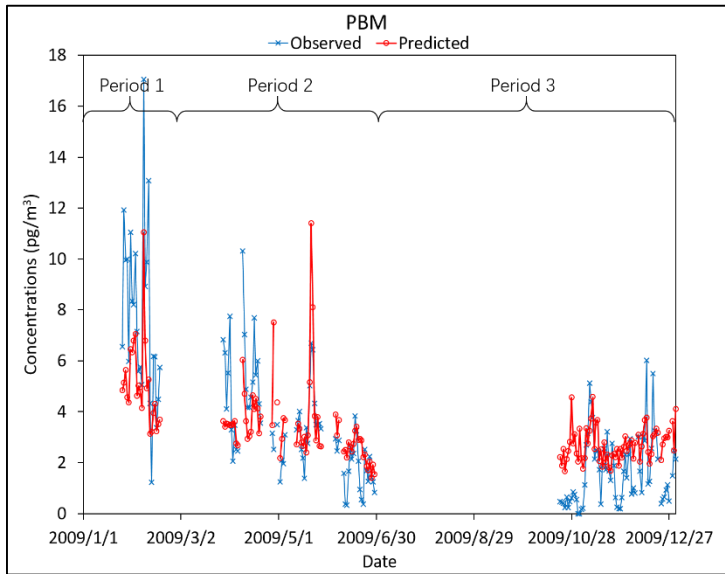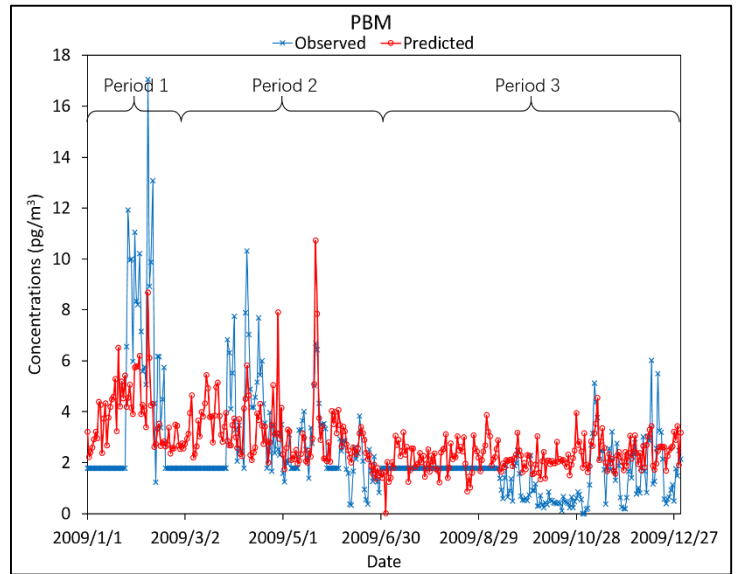

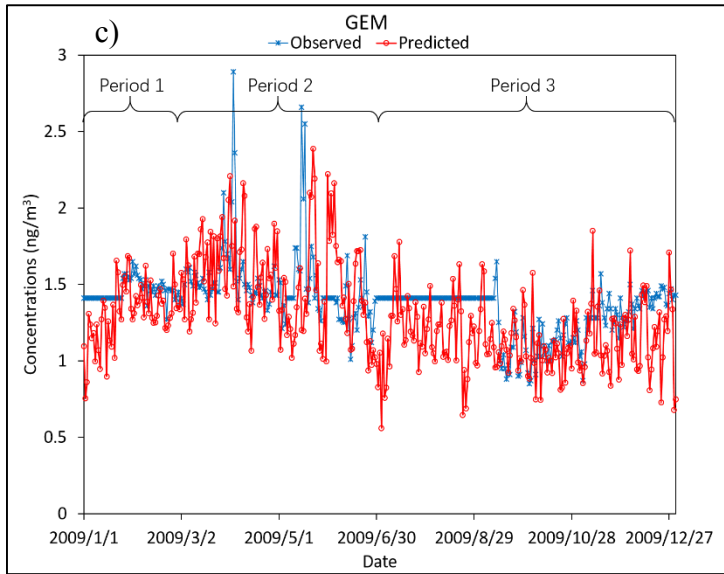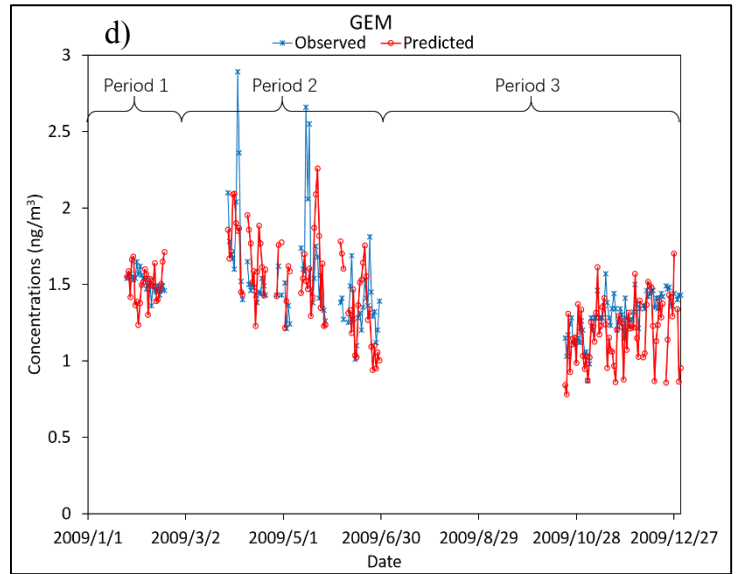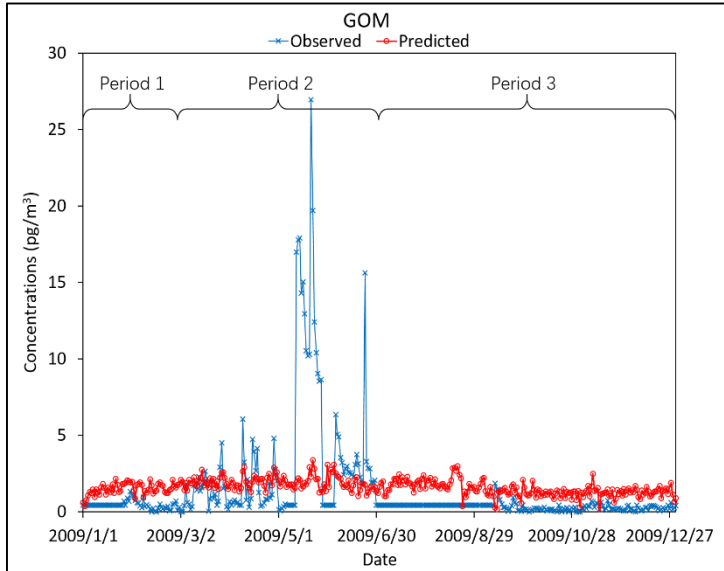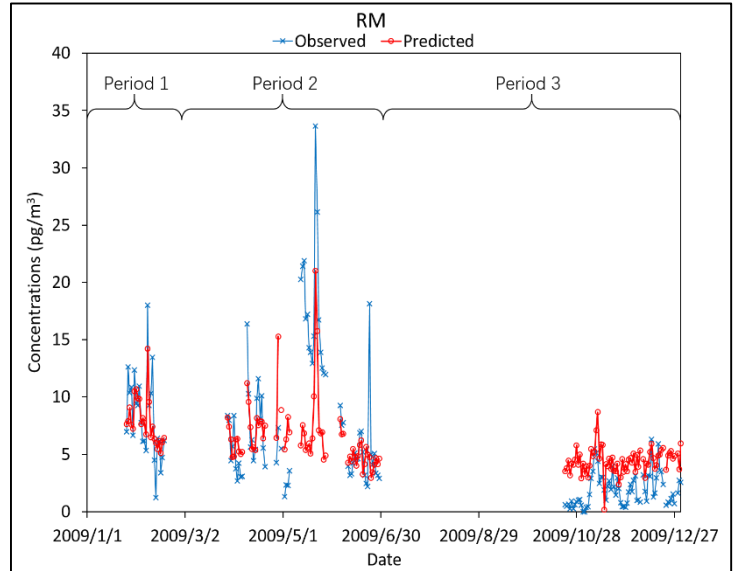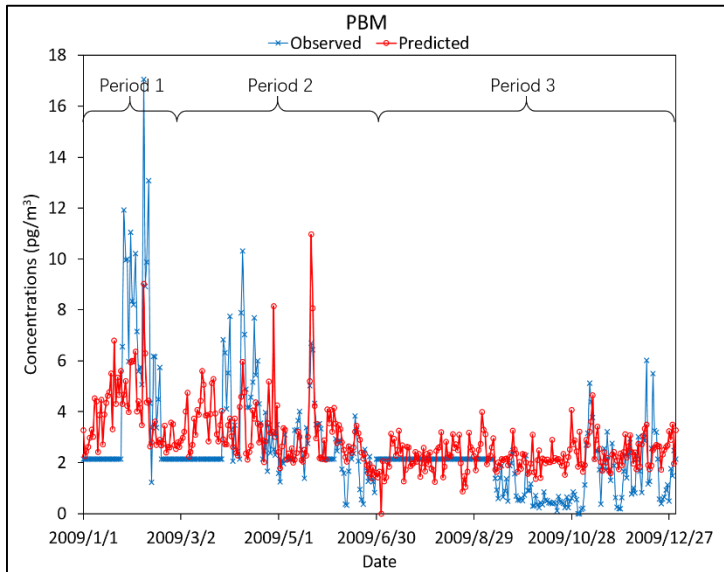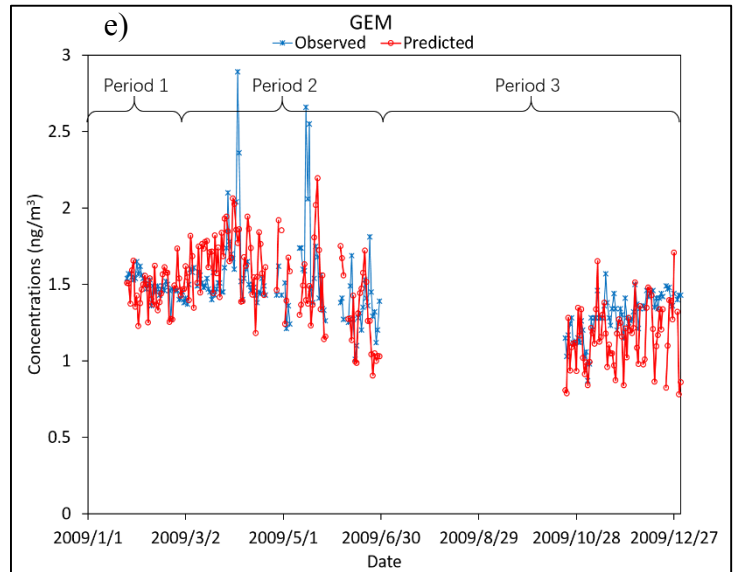

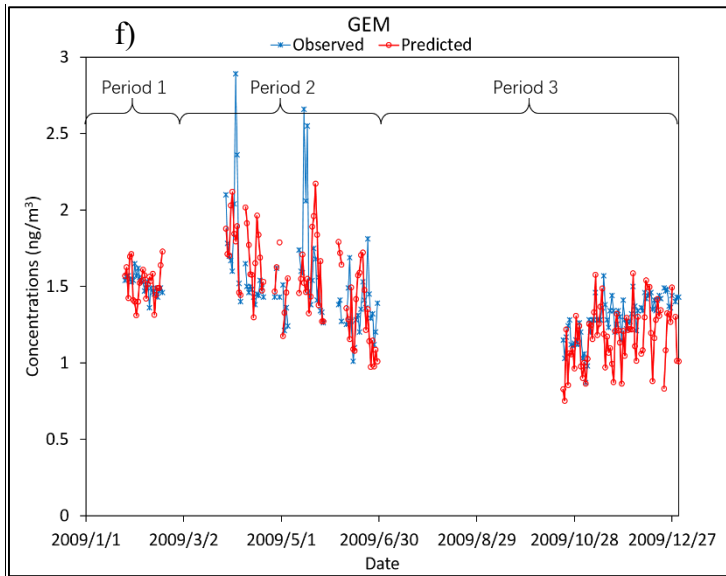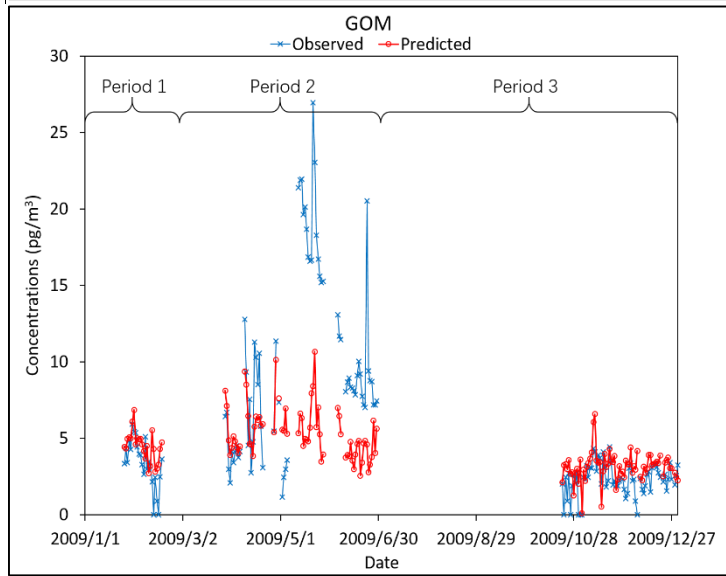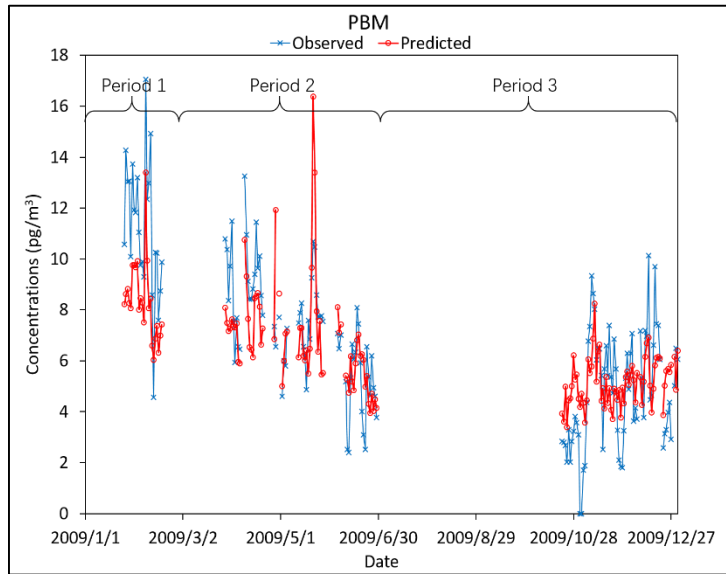

**Figure S3.** Obs/Pred time series in 2009. a) Case 2009, b) Case 09+mean, c) Case 09+median, d) Case 09+RM, e) Case 09-RM, and f) Case 09ScaleRM, observed GOM and PBM have been scaled.

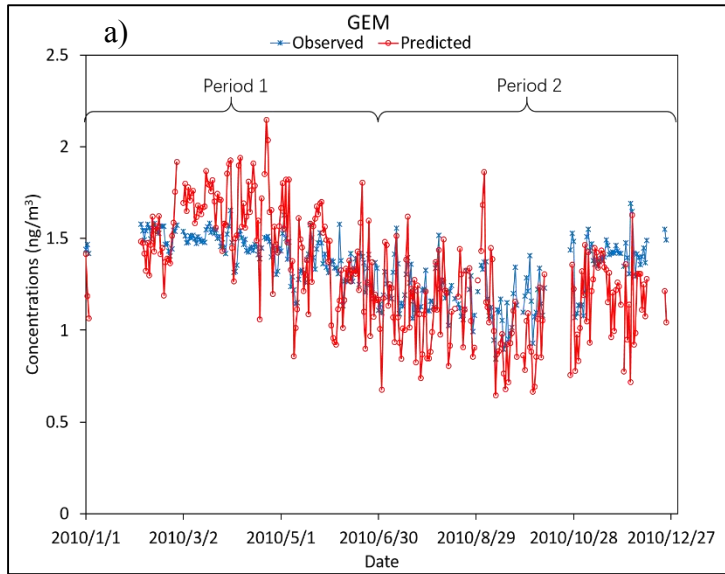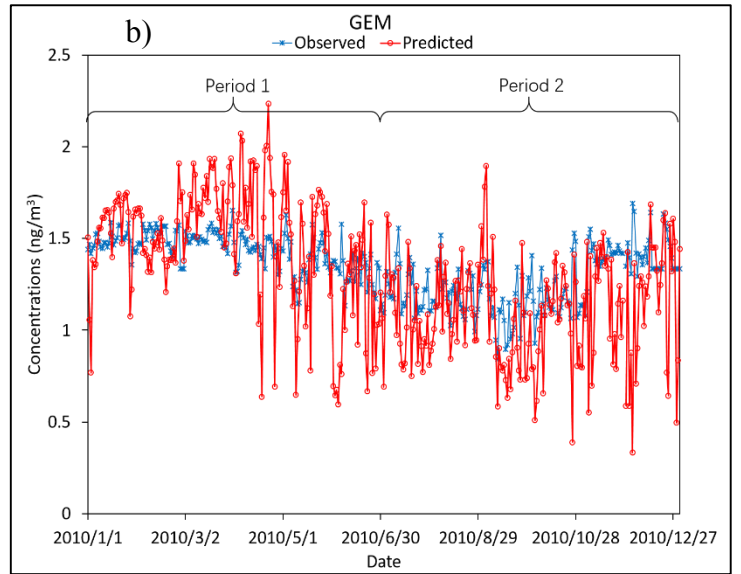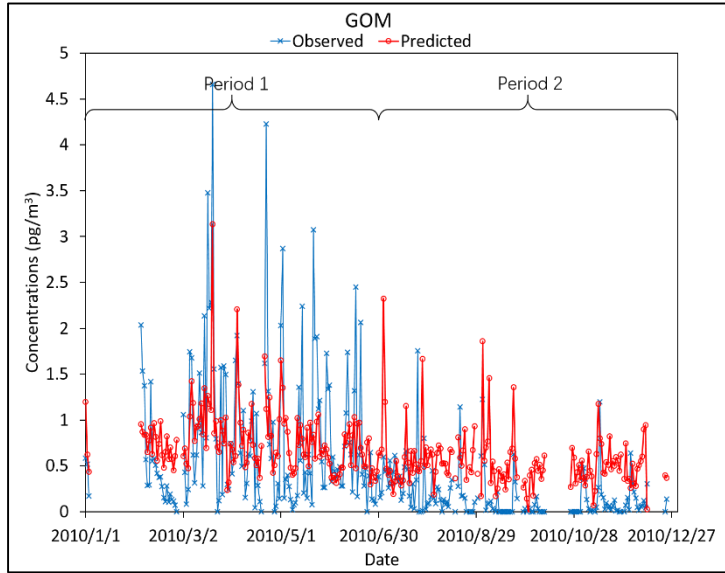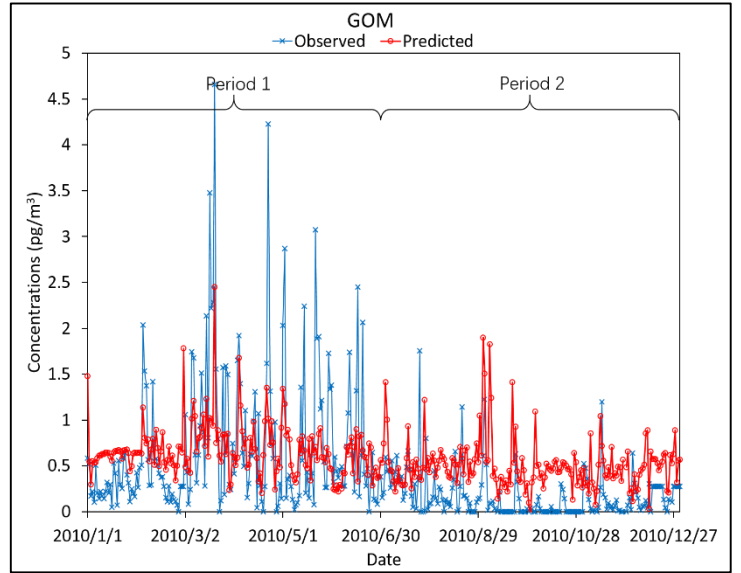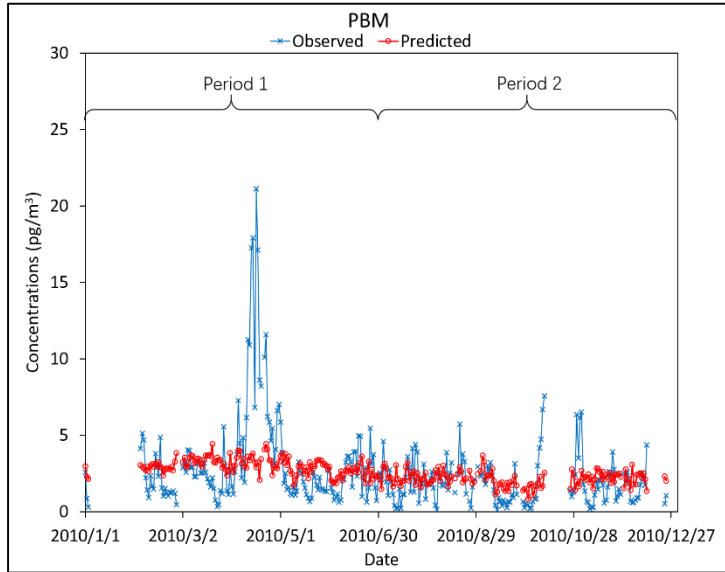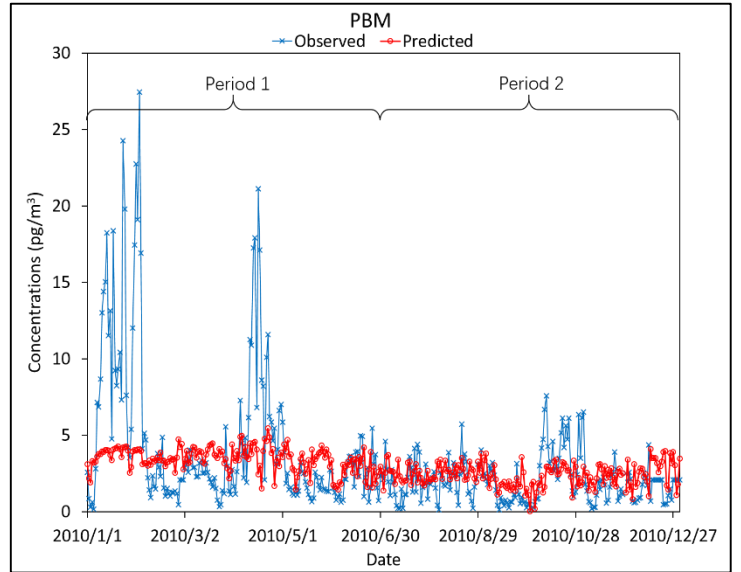

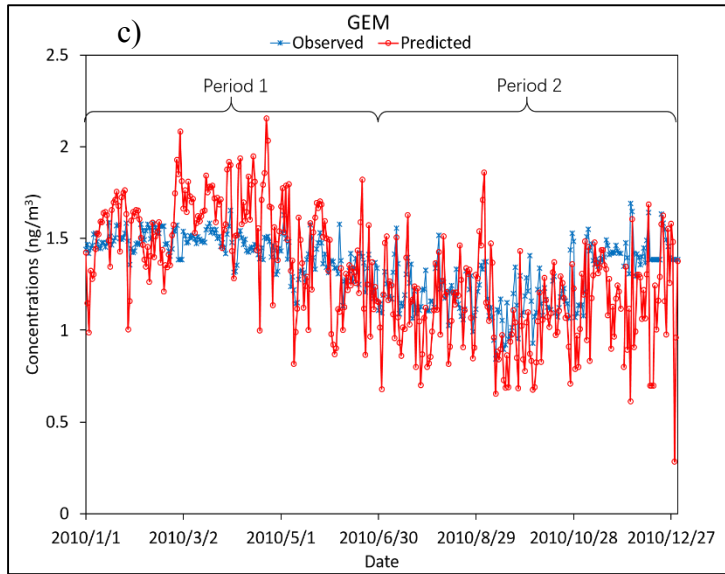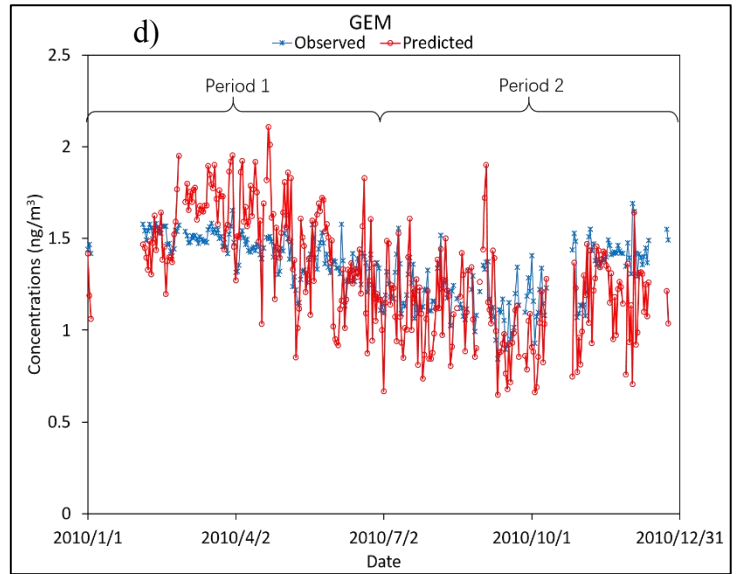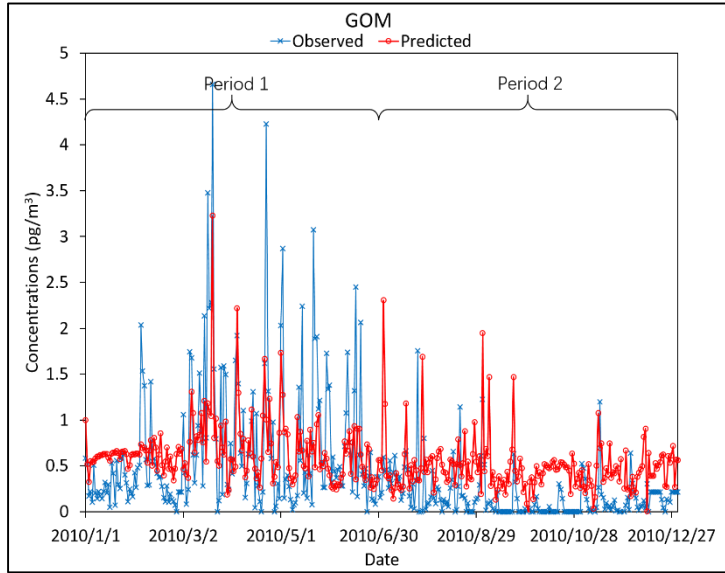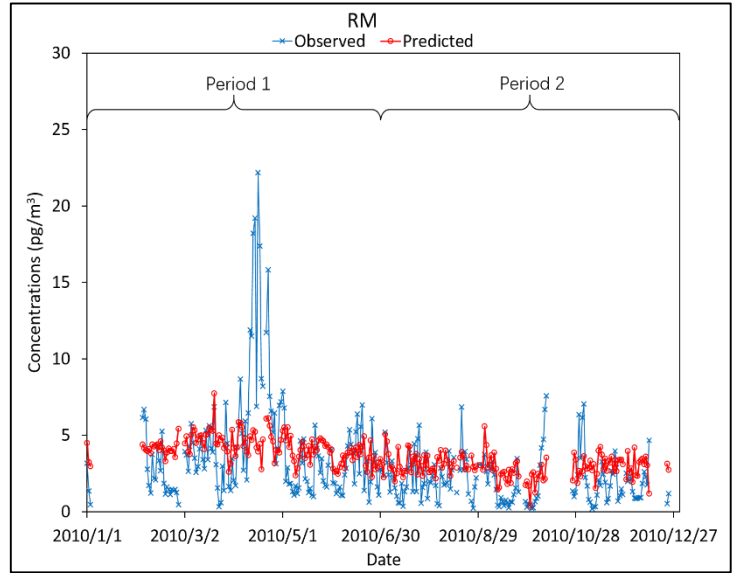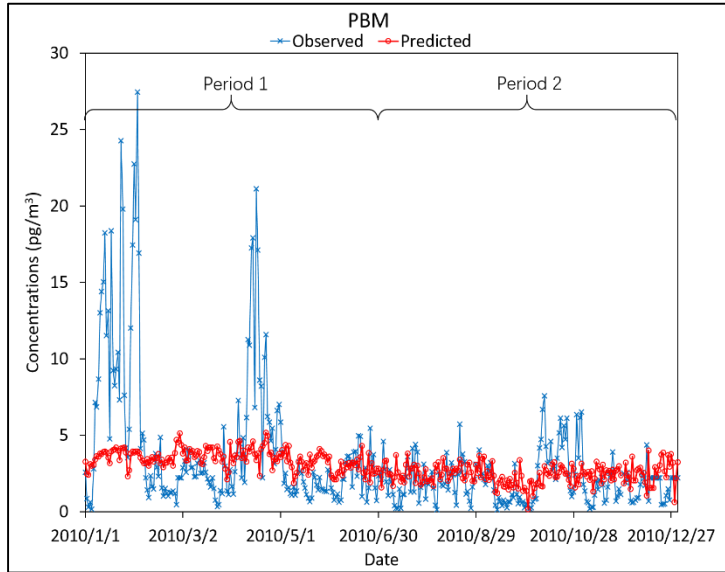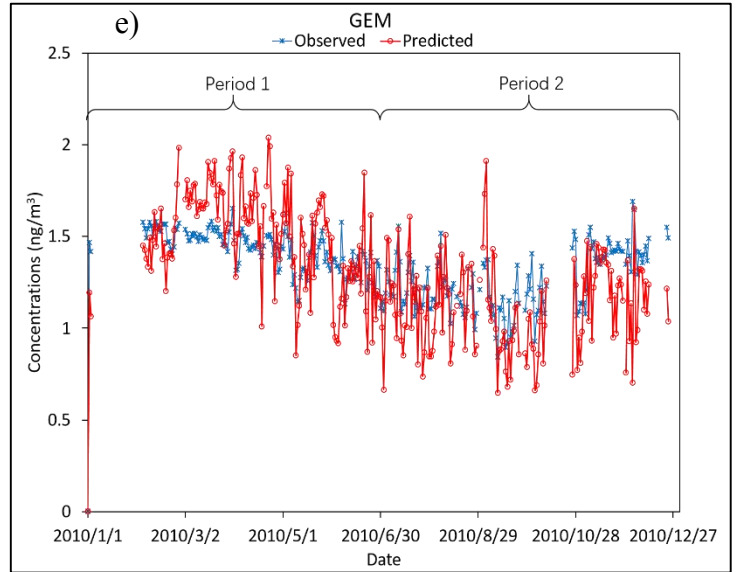



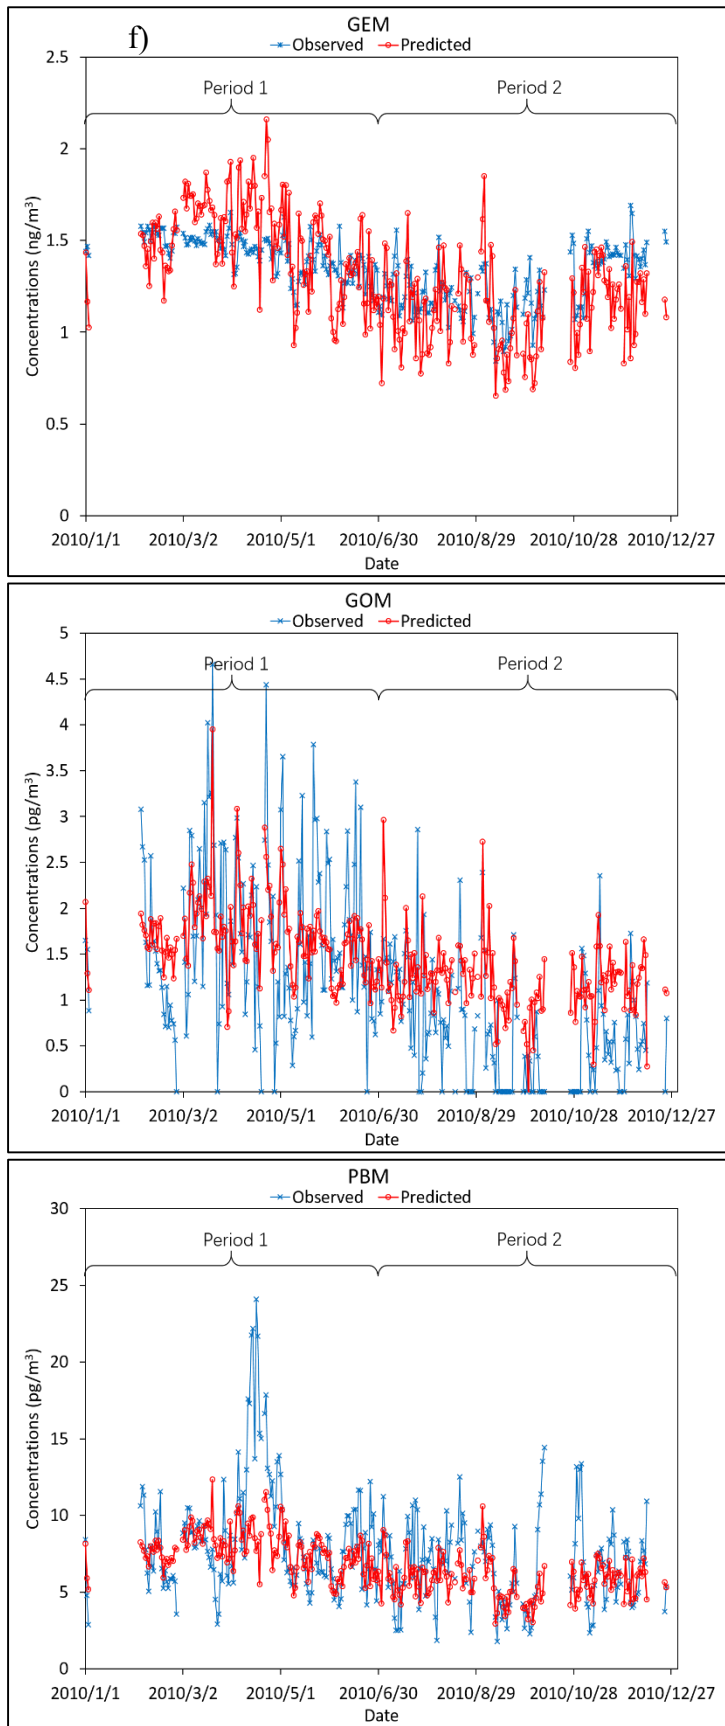

**Figure S4.** Obs/Pred time series in 2010. a) Case 2010, b) Case 10+mean, c) Case 10+median, d) Case 10+RM, e) Case 10-RM, and f) Case 10ScaleRM, observed GOM and PBM have been scaled.
